1       **Smoothened Transduces Hedgehog Signals via Activity-Dependent Sequestration of**  
2       **PKA Catalytic Subunits**

3  
4       Corvin D. Arveseth<sup>1,5</sup>, John T. Happ<sup>1,5</sup>, Danielle S. Hedeem<sup>1,6</sup>, Ju-Fen Zhu<sup>1,6</sup>, Jacob L. Capener<sup>1</sup>,  
5       Dana Klatt Shaw<sup>2,7</sup>, Ishan Deshpande<sup>3</sup>, Jiahao Liang<sup>3</sup>, Jiwei Xu<sup>4</sup>, Sara L. Stubben<sup>1,8</sup>, Isaac B.  
6       Nelson<sup>1</sup>, Madison F. Walker<sup>1</sup>, Nevan J. Krogan<sup>4</sup>, David J. Grunwald<sup>2</sup>, Ruth Hüttenhain<sup>4</sup>, Aashish  
7       Manglik<sup>3</sup>, Benjamin R. Myers<sup>1,+</sup>

8  
9       <sup>1</sup>Department of Oncological Sciences, Department of Biochemistry, Department of  
10      Bioengineering, University of Utah School of Medicine, Salt Lake City, UT 84112 USA

11      <sup>2</sup>Department of Human Genetics, University of Utah School of Medicine, Salt Lake City, UT  
12      84112 USA

13      <sup>3</sup>Department of Pharmaceutical Chemistry, Department of Anaesthesia and Perioperative Care,  
14      University of California, San Francisco, CA 94158 USA

15      <sup>4</sup>Department of Cellular and Molecular Pharmacology, Quantitative Biosciences Institute,  
16      University of California, San Francisco, CA 94158, USA; J. David Gladstone Institutes, San  
17      Francisco, CA 94158, USA

18      <sup>5</sup>Co-first author

19      <sup>6</sup>Co-second author

20      <sup>7</sup>Present address: Department of Developmental Biology, Washington University School of  
21      Medicine, St. Louis, MO 63110 USA

22      <sup>8</sup>Present address: Department of Plant and Wildlife Sciences, College of Life Sciences, Brigham  
23      Young University, Provo, UT 84602 USA

24  
25      <sup>+</sup>Correspondence: [benjamin.myers@hci.utah.edu](mailto:benjamin.myers@hci.utah.edu)  
26  
27  
28  
29  
30  
31  
32

33 **ABSTRACT:**

34

35 The Hedgehog (Hh) pathway is essential for organ development, homeostasis, and regeneration.  
36 Dysfunction of this cascade drives several cancers. To control expression of pathway target  
37 genes, the G protein-coupled receptor (GPCR) Smoothed (SMO) activates glioma-associated  
38 (GLI) transcription factors via an unknown mechanism. Here we show that, rather than conforming  
39 to traditional GPCR signaling paradigms, SMO activates GLI by binding and sequestering protein  
40 kinase A (PKA) catalytic subunits at the membrane. This sequestration, triggered by GPCR kinase  
41 2 (GRK2)-mediated phosphorylation of SMO intracellular domains, prevents PKA from  
42 phosphorylating soluble substrates, releasing GLI from PKA-mediated inhibition. Our work  
43 provides a mechanism directly linking Hh signal transduction at the membrane to GLI transcription  
44 in the nucleus. This process is more fundamentally similar between species than prevailing  
45 hypotheses suggest. The mechanism described here may apply broadly to other GPCR- and  
46 PKA-containing cascades in diverse areas of biology.

47

48

49

## 50 INTRODUCTION:

51

52 The Hedgehog (Hh) pathway controls the development of nearly every vertebrate organ (Briscoe  
53 and Thérond, 2013; Ingham and McMahon, 2001; Ingham et al., 2011; Kong et al., 2019). It also  
54 plays critical roles in stem cell biology and injury-induced tissue regeneration (Petrova and Joyner,  
55 2014; Roberts et al., 2017). Insufficient pathway activation during embryogenesis gives rise to  
56 birth defects (Muenke and Beachy, 2000), whereas ectopic pathway activity drives several  
57 malignancies, including basal cell carcinoma of the skin and pediatric medulloblastoma (Pak and  
58 Segal, 2016; Wu et al., 2017).

59

60 Hh signal reception at the membrane is tightly coupled to transcriptional regulation of pathway  
61 target genes in the nucleus (Briscoe and Thérond, 2013; Kong et al., 2019; Kozielowicz et al.,  
62 2020; Qi and Li, 2020). In the pathway “off” state, Patched1 (PTCH1) inhibits the G protein-  
63 coupled receptor (GPCR) Smoothed (SMO). In the pathway “on” state, Hh proteins bind to and  
64 inactivate PTCH1, relieving SMO from inhibition (Briscoe and Thérond, 2013; Kong et al., 2019;  
65 Kozielowicz et al., 2020; Qi and Li, 2020). SMO activation ultimately results in the conversion of  
66 glioma-associated (GLI) transcription factors from repressor to activator forms (Briscoe and  
67 Thérond, 2013; Kong et al., 2019; Qi and Li, 2020). Active GLI regulates expression of Hh pathway  
68 target genes that drive cell differentiation or proliferation (Hui and Angers, 2011). The process by  
69 which vertebrate SMO activates GLI, however, is largely a mystery.

70

71 An appealing model suggests that SMO activates GLI by blocking protein kinase A (PKA), thereby  
72 releasing GLI from PKA-mediated inhibition (Alcedo et al., 1996; Ayers and Thérond, 2010;  
73 Heuvel and Ingham, 1996; Kong et al., 2019). In support of this model, inactivation of PKA  
74 catalytic subunits (PKA-C) induces the Hh pathway to near-maximal levels (Hammerschmidt et  
75 al., 1996; Huang et al., 2002; Jiang and Struhl, 1995; Li et al., 1995; Tuson et al., 2011). In  
76 addition, PKA phosphorylation of GLI hinders its transcriptional activity, while SMO activation  
77 results in loss of phosphorylation at these sites (Aza-Blanc et al., 1997; Humke et al., 2010; Méthot  
78 and Basler, 1999; Niewiadomski et al., 2013; Wang et al., 2000). Furthermore, SMO, PKA, and  
79 GLI may communicate directly with one another within a cell surface organelle known as the  
80 primary cilium, as all three proteins localize in or near this subcellular compartment (Barzi et al.,  
81 2009; Corbit et al., 2005; Gigante and Caspary, 2020; Haycraft et al., 2005; Kim et al., 2009;  
82 Rohatgi et al., 2007; Tuson et al., 2011). Nevertheless, the above model is controversial because  
83 G proteins, which canonically link GPCR activation to PKA inhibition, are not required for SMO to  
84 activate GLI (Low et al., 2008; Regard et al., 2013; Riobo et al., 2006). Thus, although PKA has  
85 been implicated in communication between SMO and GLI, the molecular mechanism by which  
86 SMO activates GLI remains poorly understood (Ayers and Thérond, 2010; Briscoe and Thérond,  
87 2013; Kong et al., 2019; Qi and Li, 2020).

88

89 To dissect SMO-GLI communication, we used a heterologous cellular system to identify and  
90 reconstitute the Hh pathway step immediately downstream of SMO. We then characterized the  
91 underlying biochemical mechanism, and assessed the physiological relevance of our findings

92 using established cellular and embryological assays of Hh signal transduction. Using this  
93 approach, we found that activated SMO blocks PKA substrate phosphorylation by directly binding  
94 and sequestering PKA-C subunits at the membrane. This prevents PKA phosphorylation of GLI,  
95 thereby triggering GLI activation. PKA-C binding to SMO is controlled by GRK family kinases that  
96 selectively phosphorylate the SMO active conformation on conserved residues in the intracellular  
97 domain. Our work reveals an unconventional route by which GPCRs can control PKA activity –  
98 one that may also be utilized by other signaling pathways that employ these proteins.

99

## 100 **RESULTS:**

101

### 102 **SMO inhibits PKA substrate phosphorylation in a G protein-independent manner**

103 We hypothesized that SMO can inhibit PKA via a G protein-independent process. To test this  
104 hypothesis, we set up a model system to study SMO regulation of PKA. GLI-based readouts are  
105 problematic in this regard, as they are affected by manipulation of either SMO or PKA; this makes  
106 it difficult to determine whether SMO and PKA reside in the same linear pathway or constitute two  
107 separate influences that converge on GLI. To overcome this and other confounding factors (see  
108 “Supplemental Information”), we reconstituted SMO regulation of PKA in a HEK293 model system  
109 using a non-GLI readout of PKA activity. This approach also allows us to employ CRISPR,  
110 biochemical, and fluorescence-based tools that are uniquely robust in HEK293 cells.

111

112 To report PKA activity, we utilized CREB (cyclic AMP response element (CRE) binding protein)  
113 transcription factors (**Figure 1A**). CREB is activated by PKA phosphorylation (Shaywitz and  
114 Greenberg, 1999), but is not known to be subject to the other major mechanisms that regulate  
115 GLI activity (Hui and Angers, 2011; Shaywitz and Greenberg, 1999). Our studies employed C-  
116 terminally-truncated versions of SMO (either SMO657 or SMO674, **Figure 1—figure**  
117 **supplement 1A,B**). These truncations contain the proximal segment of the cytoplasmic tail (pCT)  
118 that is essential for GLI activation but lack the nonessential distal segment (dCT) (**Figure 1—**  
119 **figure supplement 1A,C**) (Kim et al., 2015; Varjosalo et al., 2006). Removing the dCT improves  
120 SMO expression levels and detergent solubility (data not shown), thereby facilitating our  
121 subsequent biochemical analyses.

122

123 In its active state, SMO, like many GPCRs, can block PKA-C by engaging inhibitory G proteins  
124 ( $G\alpha_{i/o/z}$ ) that inactivate adenylyl cyclase (AC), decrease cyclic AMP (cAMP), and promote PKA-C  
125 binding to regulatory (PKA-R) subunits to form an inactive holoenzyme (**Figure 1A, route “1”**).  
126 We hypothesized, however, that SMO may directly inhibit free PKA-C subunits via a G protein-  
127 independent mechanism (**Figure 1A, route “2”**). In this case, active SMO, but not other  $G\alpha_{i/o/z}$ -  
128 coupled GPCRs, would block CREB reporter activation mediated by G protein-independent  
129 pathways.

130

131 To test this hypothesis, we expressed exogenous PKA-C, at levels likely to exceed those of  
132 endogenous PKA-R, to bypass G protein-dependent cascades. As expected, PKA-C expression  
133 strongly activated the CREB reporter (**Figure 1B**), indicating an excess of PKA-C over PKA-R.

134 Cotransfection of SMO blocked PKA-C-mediated reporter activation (**Figure 1B**), indicating that  
135 SMO can inhibit PKA-C in a G protein-independent manner. (Note that SMO is constitutively  
136 active in HEK293 cells, as its inhibitor PTCH1 is expressed at minimal levels (DeCamp et al.,  
137 2000; Masdeu et al., 2006; Myers et al., 2017; Riobo et al., 2006; Shen et al., 2013)). This  
138 blockade was partially reversed by the specific SMO antagonist KAAD-cyclopamine (KAADcyc),  
139 indicating that it depends on SMO activity. KAADcyc completely reversed effects of SMO in  
140 experiments where SMO blocked the reporter submaximally (data not shown). In contrast,  
141 activation of a canonical  $G\alpha_{i/o}$ -coupled GPCR, the M2 acetylcholine receptor (M2AChR), with its  
142 ligand carbachol did not block the effects of PKA-C expression (**Figure 1B**). This result cannot be  
143 explained by issues with receptor expression, trafficking, or ligand stimulation, because carbachol  
144 treatment of M2AChR-expressing cells readily blocked AC-evoked reporter activation (**Figure 1—**  
145 **figure supplement 1D**). These experiments indicate that SMO can regulate PKA-C in a G  
146 protein-independent manner.

147  
148 We verified this conclusion by showing that SMO also blocked PKA-C in HEK293  $G\alpha$ -null cells  
149 harboring CRISPR-mediated deletions in all 13 human  $G\alpha$  genes (Hisano et al., 2019) (**Figure**  
150 **1C**). In contrast, M2AChR did not (**Figure 1—figure supplement 1D**), consistent with its function  
151 as a canonical  $G\alpha_{i/o}$ -coupled GPCR. Taken together, our findings indicate that SMO can inhibit  
152 PKA substrate phosphorylation even when G proteins are absent.

153

154 **Figure 1**

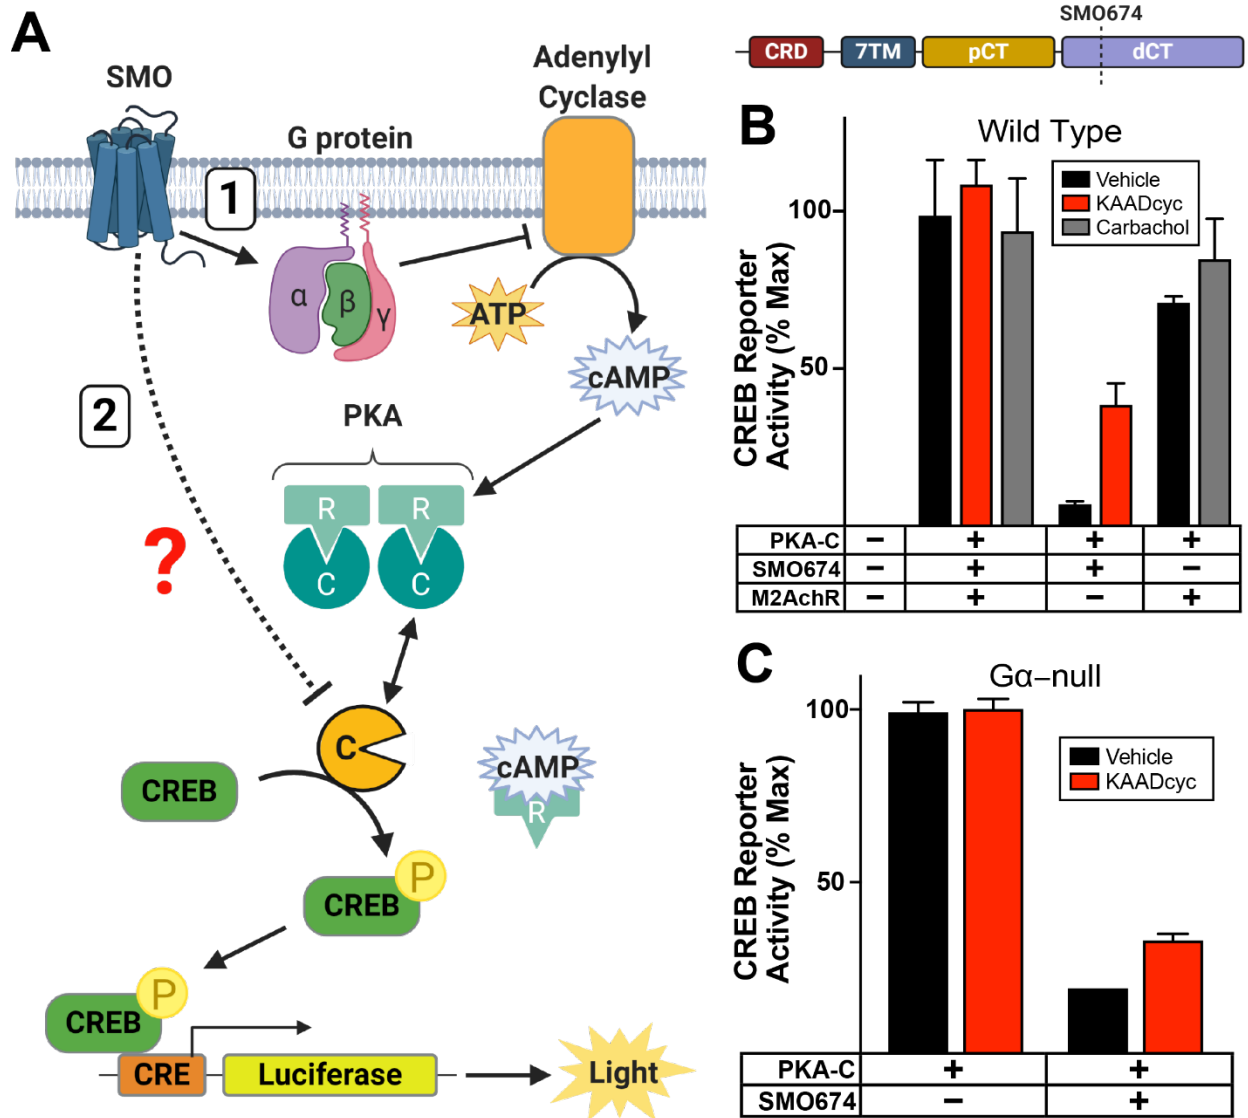

155 **Figure 1: SMO inhibits PKA substrate phosphorylation in a G protein-independent manner.**  
 156 (A) Schematic of assay to detect phosphorylation of soluble PKA substrates. PKA-C  
 157 phosphorylates CREB which binds CRE, inducing expression of luciferase. SMO can inhibit PKA-  
 158 C by decreasing cAMP via inhibitory G proteins and Adenylyl Cyclase (AC) (route “1”).  
 159 Alternatively, SMO may inhibit PKA-C via a G protein-independent mechanism (route “2”). (B)  
 160 Wild-type HEK293 cells were transfected with CRE-luciferase reporter plasmid and GFP (as a  
 161 negative control) or PKA-C, either alone, with SMO674 (see cartoon above), or with a canonical  
 162  $G\alpha_{i/o}$ -coupled GPCR, M2AChR. Transfected cells were treated with the indicated drugs (vehicle  
 163 control, M2AChR ligand carbachol (3  $\mu$ M), or SMO antagonist KAADcyc (1  $\mu$ M)). Following drug  
 164 treatment, cells were lysed and luminescence measured. Note that transfected SMO is  
 165 constitutively active in HEK293 cells because its inhibitor PTCH1 is present at minimal levels

166 *(Masdeu et al., 2006; Myers et al., 2017; Riobo et al., 2006; Shen et al., 2013), whereas M2AChR*  
167 *requires carbachol for activity. For the sake of clarity, the SMO constructs utilized in each*  
168 *experiment are indicated in the corresponding figure panel. (See Figure 1—figure supplement 1B*  
169 *for additional information.) (C) HEK293 Gα-null cells were transfected with PKA-C, either alone*  
170 *or with SMO674, and treated with vehicle or KAADCyc (1 μM). Data are normalized to 100%,*  
171 *which reflects reporter activation from PKA-C-transfected cells treated with vehicle (n = 3*  
172 *biological replicates per condition, error bars = s.e.m.). See Supplemental Table 1 for statistical*  
173 *analysis.*

174 **SMO uses its essential pCT domain to recruit PKA-C to the membrane**

175 GPCRs control PKA in part via G protein and cAMP-dependent regulation of its enzymatic activity  
176 (Taylor et al., 2012, 2013). However, another critical determinant of substrate phosphorylation is  
177 PKA's localization within the cell. Interactions of PKA with specific receptors, signaling scaffolds,  
178 and anchoring proteins can bias its enzymatic activity towards certain subcellular locations and  
179 away from others (Scott and Pawson, 2009; Torres-Quesada et al., 2017) . We hypothesized that  
180 SMO might control PKA subcellular localization, thereby restricting access of PKA to soluble  
181 substrates. Such a model could explain how SMO blocks CREB phosphorylation without requiring  
182 G proteins (**Figure 1**).

183  
184 We tested this hypothesis by examining the effect of SMO on the subcellular localization of PKA-  
185 C in HEK293 cells. In the presence of SMO, PKA-C localized to the membrane, colocalizing with  
186 SMO in a majority of cells (**Figure 2A,C**). In contrast, PKA-C did not display this membrane  
187 localization when SMO was absent (data not shown). SMO colocalized with PKA-C to a similar  
188 extent as it did with the nanobody (Nb) NbSmo2; this Nb binds efficiently and specifically to the  
189 activated conformation of SMO (**Figure 2A, Figure 2—figure supplement 1A,B, and Figure 2**  
190 **—figure supplement 2**) via an intracellular epitope within the seven-transmembrane (7TM)  
191 domain (**Figure 2—figure supplement 1C,D**). As a control, the non-SMO-binding Nb, Nb $\beta$ 2AR80  
192 (Irannejad et al., 2013; Rasmussen et al., 2011), did not colocalize with SMO (**Figure 2A and**  
193 **Figure 2—figure supplement 2**). Deletion of the SMO pCT abolished colocalization with PKA-C,  
194 but not with NbSmo2 (**Figure 2B,C and Figure 2—figure supplement 2**). Thus, the SMO pCT,  
195 which is essential for activation of GLI (**Figure 1—figure supplement 1C**), is also required to  
196 sequester PKA-C at the membrane.



197 **Figure 2**

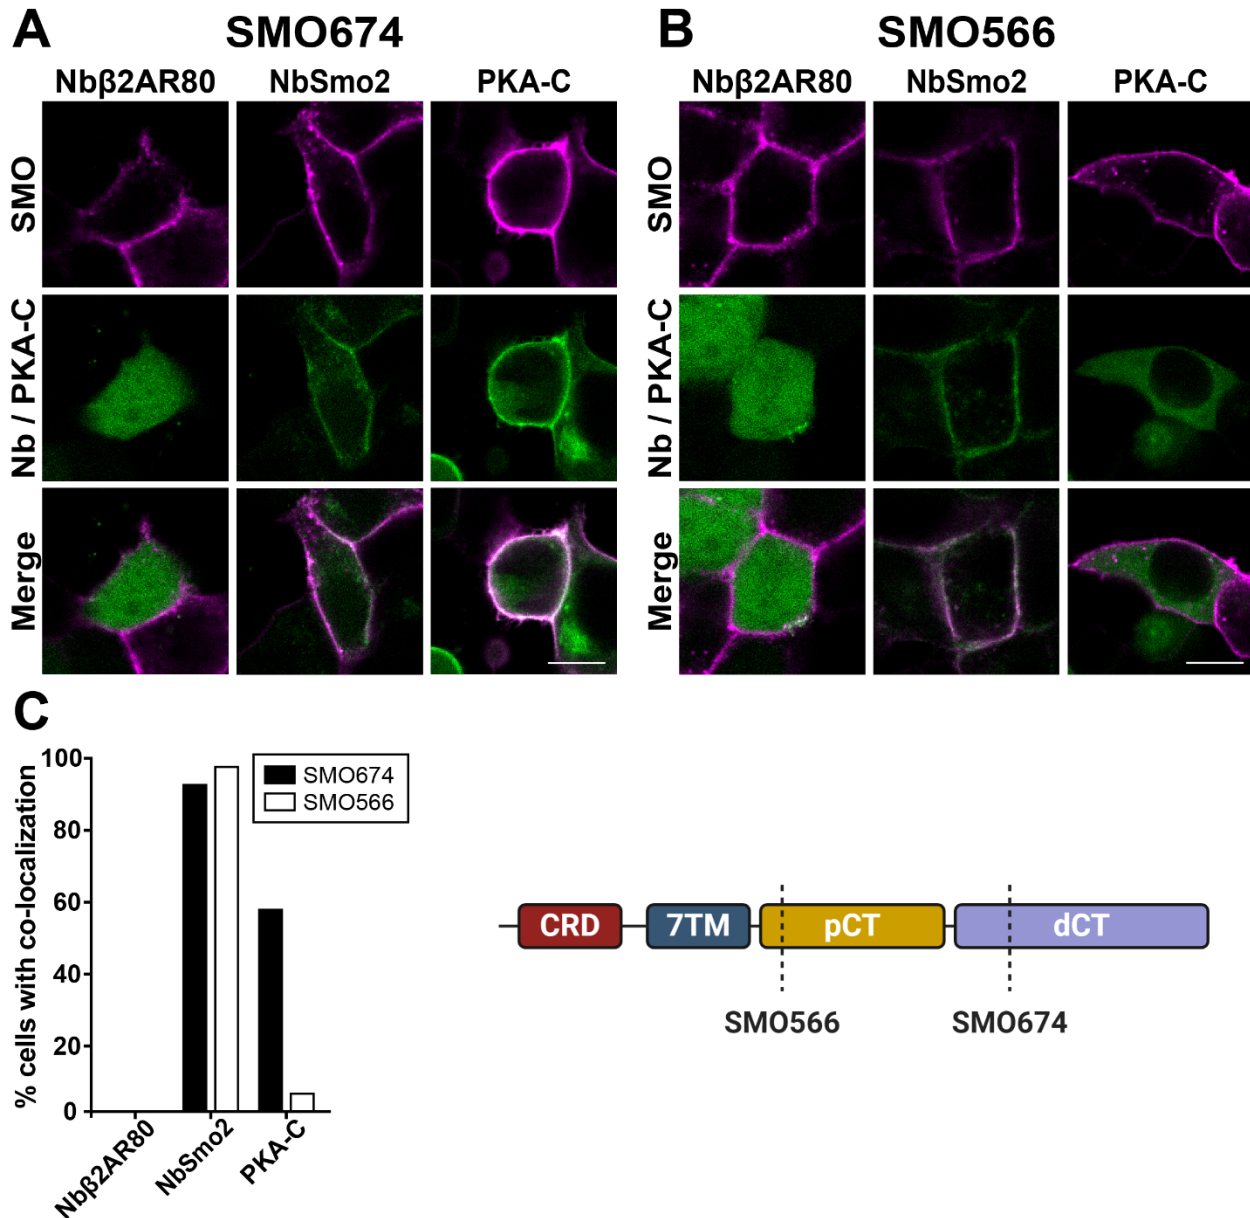

198 **Figure 2: SMO uses its essential pCT domain to recruit PKA-C to the membrane.**

199 Cells expressing (A) FLAG-tagged SMO674 that contains the pCT or (B) FLAG-tagged SMO566

200 that lacks the pCT (see cartoon at lower right), were co-transfected with Nbβ2AR80-GFP,

201 NbSmo2-YFP or PKA-C-YFP. Confocal microscopy images show SMO (magenta) and co-

202 expressed proteins (green). (C) Percent of transfected cells that displayed colocalization in (A)

203 and (B). Scale bar = 10 μm. (n = 29-121 cells per condition).

204

## 205 **The SMO pCT interacts with PKA-C**

206 Vertebrate SMO may recruit PKA-C to the membrane (**Figure 2**) via a direct protein-protein  
207 interaction. Consistent with this hypothesis, *Drosophila* Smo associates with PKA-C subunits (Li  
208 et al., 2014; Ranieri et al., 2014) . A comparable interaction, however, has not been reported for  
209 vertebrate SMO. To allow sensitive detection of protein-protein interactions in living cells without  
210 solubilization or wash steps that can disrupt labile interactions in conventional biochemical  
211 assays, we used bioluminescence resonance energy transfer (BRET) (Marullo and Bouvier,  
212 2007). We fused SMO to a luciferase energy donor (nanoluc) and PKA-C or other candidate  
213 interactors to a YFP acceptor. Upon interaction (i.e, within ~10 nm of SMO), light produced by  
214 luciferase excites YFP (**Figure 3A, left**). The YFP/luciferase emission ratio thus provides a  
215 normalized metric for protein interactions with SMO.

216  
217 SMO and PKA-C produced extremely strong BRET signals that often exceeded those of our  
218 NbSmo2 positive control (**Figure 3A, right**). SMO BRET with PKA-C mainly required the pCT but  
219 not the dCT (compare SMO657 to SMO $\Delta$ 561-657) (**Figure 3B**). As expected, SMO BRET with  
220 NbSmo2 was efficient regardless of the CT (**Figure 3B**). Truncations within the SMO pCT  
221 revealed that amino acids 574 to 657 are crucial for BRET with PKA-C (**Figure 3C and Figure**  
222 **1—figure supplement 1B**). SMO and PKA-C therefore interact in living cells in a pCT-dependent  
223 manner.

224  
225 The BRET between SMO and PKA-C reflects a *bona fide* protein-protein interaction, based on  
226 several observations. First, titration of a fixed amount of SMO against a varying amount of PKA-  
227 C revealed a saturable BRET response (**Figure 3—figure supplement 1A**), indicative of specific  
228 binding rather than nonspecific crowding-induced collisions. Second, a control membrane protein,  
229 PTCH1, fails to exhibit BRET with PKA-C (**Figure 3—figure supplement 1B**). Several other  
230 proteins, including Nb $\beta$ 2AR80, suppressor of Fused (SUFU) (Kong et al., 2019), and  $\beta$ arrestins  
231 (Shenoy and Lefkowitz, 2011), also showed minimal or no BRET with SMO (**Figure 3A and**  
232 **Figure 3—figure supplement 1C,D**). Third, BRET is specific, since it requires defined sequences  
233 within SMO (**Figure 3B,C**). Finally, BRET is unlikely an artifact of protein overexpression, as  
234 BRET signals do not correlate with expression levels of acceptor proteins (**Figure 3—figure**  
235 **supplement 1E**).

236  
237 To test whether the SMO pCT is sufficient to interact with PKA-C, we studied a soluble SMO  
238 construct containing this domain but lacking the extracellular and seven-transmembrane (7TM)  
239 regions (SMO555-674). This construct showed BRET with PKA-C (**Figure 3D**), albeit at lower  
240 levels than SMO containing the 7TM domain (compare to **Figure 3B,C**). Thus, the pCT provides  
241 the core determinants of PKA-C binding, while other regions of SMO may boost the efficiency of  
242 the interaction.

243  
244 To verify the conclusions of our BRET studies biochemically, we tested whether SMO and PKA-  
245 C copurify from detergent-solubilized HEK293 cells expressing both proteins. We found that PKA-  
246 C copurified with SMO, and the amount is dramatically enhanced by dithiobis(succinimidyl

247 propionate) (DSP), a membrane-permeable amine-specific crosslinker added prior to cell lysis to  
248 stabilize protein complexes. In contrast, Nb $\beta$ 2AR80 did not copurify with SMO (**Figure 3E and**  
249 **Figure 3—figure supplement 2**). Consistent with our BRET studies, SMO / PKA-C copurification  
250 required the SMO pCT (**Figure 3E**). These data biochemically confirm our BRET findings that  
251 SMO and PKA-C interact specifically. SMO / PKA-C complexes may contain additional proteins  
252 or lipids. However, SMO and PKA-C copurify in similar quantities, and no other proteins were  
253 present at comparable levels other than nonspecific contaminants (**Figure 3E**), suggesting that  
254 SMO and PKA-C interact directly.  
255

256 **Figure 3**

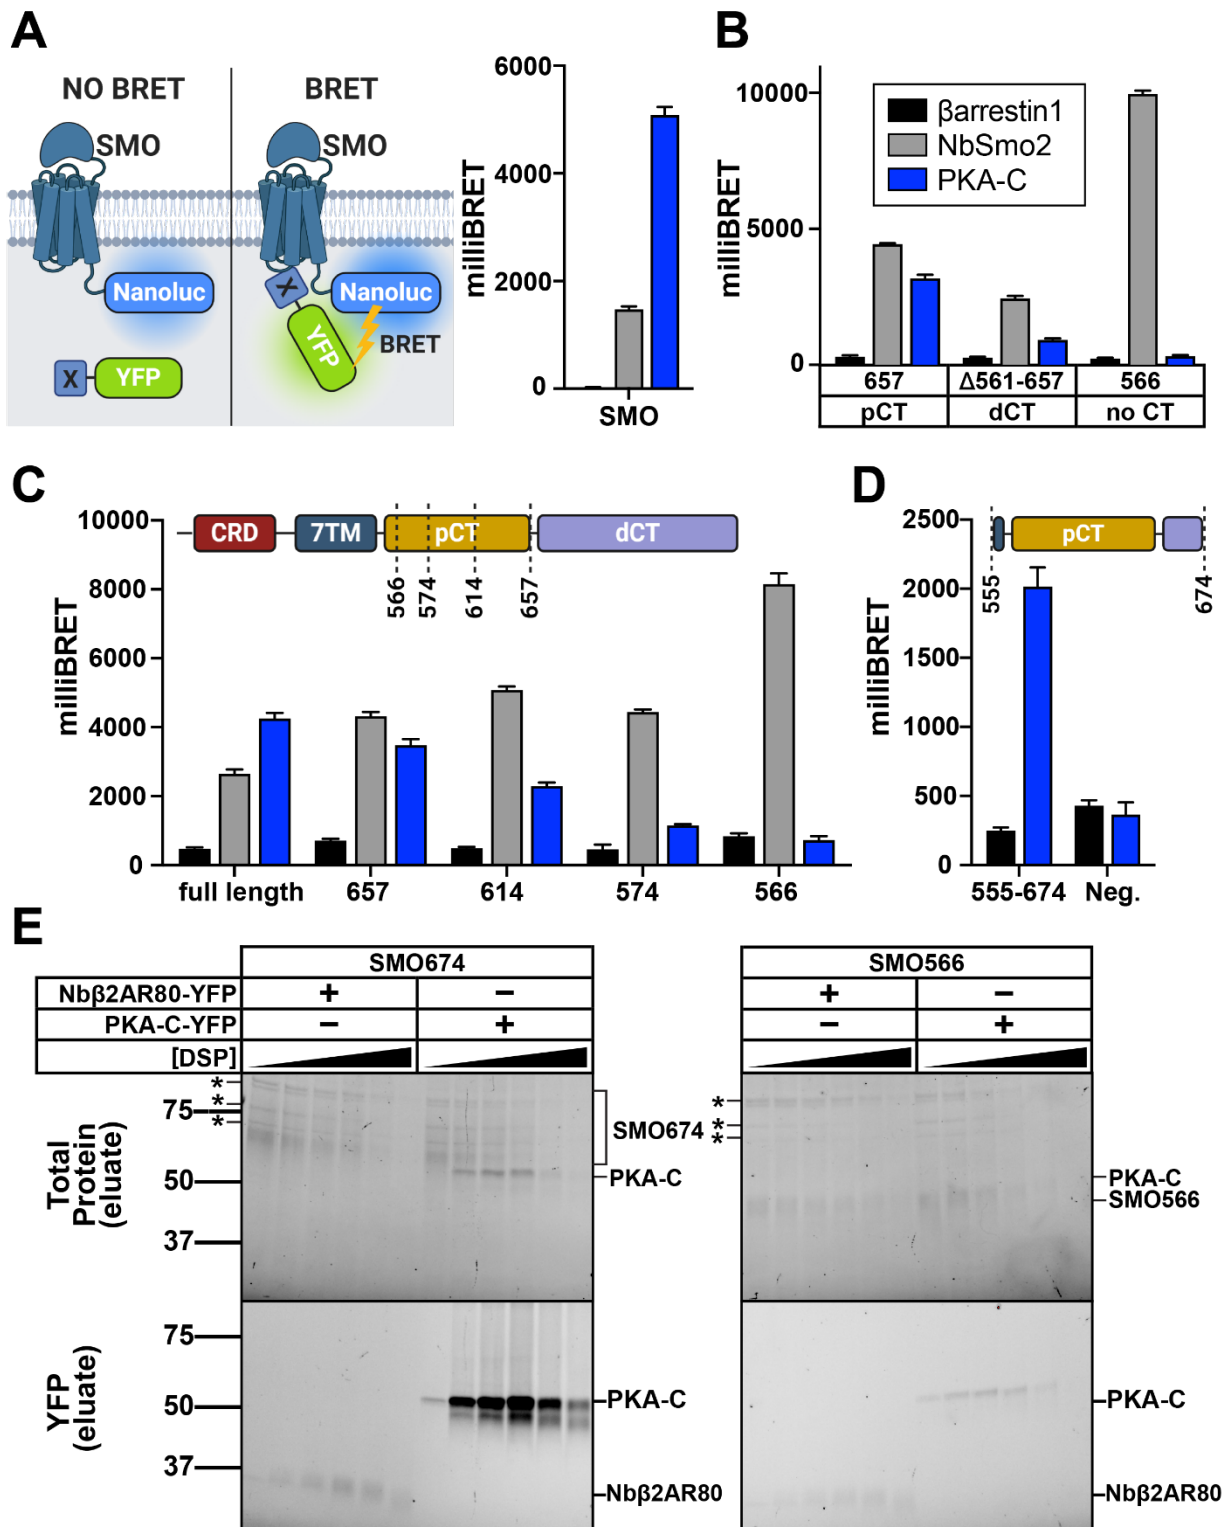

258 **Figure 3: The SMO pCT interacts with PKA-C.**

259 (A) (Left) Schematic showing BRET between a nanoluc-tagged donor (SMO-nanoluc) and a YFP-  
260 tagged acceptor. For all BRET experiments in this figure, HEK293 cells were transfected with  
261 nanoluc-tagged SMO, along with YFP-tagged  $\beta$ arrestin-1 (black), NbSmo2 (gray) or PKA-C  
262 (blue). (Right) BRET experiment employing SMO with a full-length cytoplasmic tail. (B) Nanoluc-  
263 tagged SMO657 (which contains the pCT), SMO $\Delta$ 561-657 (which contains the dCT), or SMO566  
264 (which lacks the CT entirely) serve as donors. Note that NbSmo2 binding does not require the  
265 SMO CT (see Figure 2—figure supplement 1). In fact, NbSmo2 BRET increases upon SMO CT  
266 truncation, likely because the decreased distance between the NbSmo2 binding site and the  
267 nanoluc tag leads to more efficient BRET. (C) Nanoluc fusions of successive SMO CT truncations  
268 (SMO, SMO657, SMO614, SMO574, and SMO566) were utilized to determine the region of the  
269 pCT required for efficient BRET with PKA-C. Cartoon above the graph indicates the position of  
270 each CT truncation. (D) BRET between PKA-C and a Protein C- and nanoluc-tagged SMO pCT  
271 construct, without extracellular or 7TM domains (SMO555-674, see cartoon above). The same  
272 construct lacking SMO sequences (“Neg.”) serves as a negative control. (E) HEK293 cells were  
273 infected with viruses encoding FLAG-tagged SMO674 or SMO566, and YFP-tagged PKA-C or  
274 Nb $\beta$ 2AR80, and treated with increasing concentrations of DSP crosslinker (0, 0.125, 0.25, 0.5, 1,  
275 or 2 mM). Following DSP quenching, cell lysis, and FLAG purification of SMO complexes, purified  
276 samples were separated on reducing SDS-PAGE. Total protein (top) and in-gel YFP fluorescence  
277 scans (bottom) for FLAG eluates are shown. \* = copurifying contaminant proteins. Molecular  
278 masses are in kDa. Recovery of SMO / PKA-C complexes declines at DSP concentrations above  
279 1 mM, likely because high DSP concentrations induce protein aggregation which decreases  
280 soluble protein yields in total cell lysates (see Figure 3—figure supplement 2). Data are reported  
281 as milliBRET ratios (YFP/Renilla x 1000), and background BRET values derived from cells  
282 expressing SMO-nanoluc alone were subtracted from all measurements. (n = 3-6 biological  
283 replicates per condition. Error bars = s.e.m.) See Supplemental Table 1 for statistical analysis.

284  
285

286 **SMO interacts with free PKA-C subunits rather than PKA holoenzymes**

287 Many GPCRs employ A-kinase anchoring proteins (AKAPs) to bind PKA holoenzymes via their  
288 PKA-R subunits (Scott and Pawson, 2009; Torres-Quesada et al., 2017). However, our  
289 biochemical studies (**Figure 3E**) suggest that SMO interacts directly with free PKA-C without  
290 participation from PKA-R. To test this hypothesis, we performed BRET experiments in cells  
291 expressing SMO and PKA-C or PKA-R or both (**Figure 4A**). YFP-tagged PKA-R exhibited only  
292 minimal BRET with SMO (**Figure 4B**), and coexpression of untagged PKA-C did not increase this  
293 signal (**Figure 4C, Vehicle**). These data indicate that PKA-C neither interacts with SMO via PKA-  
294 R (**Figure 4A, iii**), nor recruits PKA-R-containing holoenzymes to SMO (**Figure 4A, ii**). SMO  
295 therefore does not bind holoenzymes that require cAMP for activation; instead, SMO binds free,  
296 catalytically active PKA-C subunits (**Figure 4A, i**).

297  
298 Although SMO / PKA-C complexes do not directly involve PKA-R, cAMP signals may still affect  
299 SMO / PKA-C interactions by dissociating holoenzymes, thereby increasing concentrations of free  
300 PKA-C within the cell. We therefore examined the effect of cAMP production on SMO / PKA-C  
301 BRET in the presence of untagged PKA-R. cAMP production increased BRET under these  
302 conditions (**Figure 4C**). Effects of cAMP production on SMO / PKA-C BRET required PKA-R  
303 expression, as expected (**Figure 4C**). We conclude that cAMP can act on PKA holoenzymes to  
304 tune the SMO / PKA-C interaction.

305  
306 PKA-C forms a bi-lobed structure with an active site involved in substrate binding and phosphoryl  
307 transfer on one face and an extended PKA-R binding surface on the opposite face (Taylor et al.,  
308 2012, 2013). In addition, an N-terminal tail ("N-tail") region undergoes myristoylation and mediates  
309 interactions with accessory factors (**Figure 4D**) (Bastidas et al., 2012; Pepperkok et al., 2000;  
310 Sastri et al., 2005; Tholey et al., 2001). A K73H mutation in the active site (Knighton et al., 1991;  
311 Zhang et al., 2015b) modestly inhibited BRET between SMO and PKA-C. An L206R mutation that  
312 affects substrate recognition and the PKA-R binding interface (Hannawacker et al., 2019) gave  
313 similar results, while H87Q W196R (Orellana and McKnight, 1992), which affects a distinct region  
314 of the PKA-R binding interface (Zhang et al., 2015b), did not block BRET (**Figure 4E**). In contrast,  
315 deleting portions of the N-tail significantly reduced BRET between SMO and PKA-C (**Figure 4F**).  
316 These experiments highlight a critical role for the N-tail of PKA-C in mediating interactions with  
317 SMO.

318

319 **Figure 4**

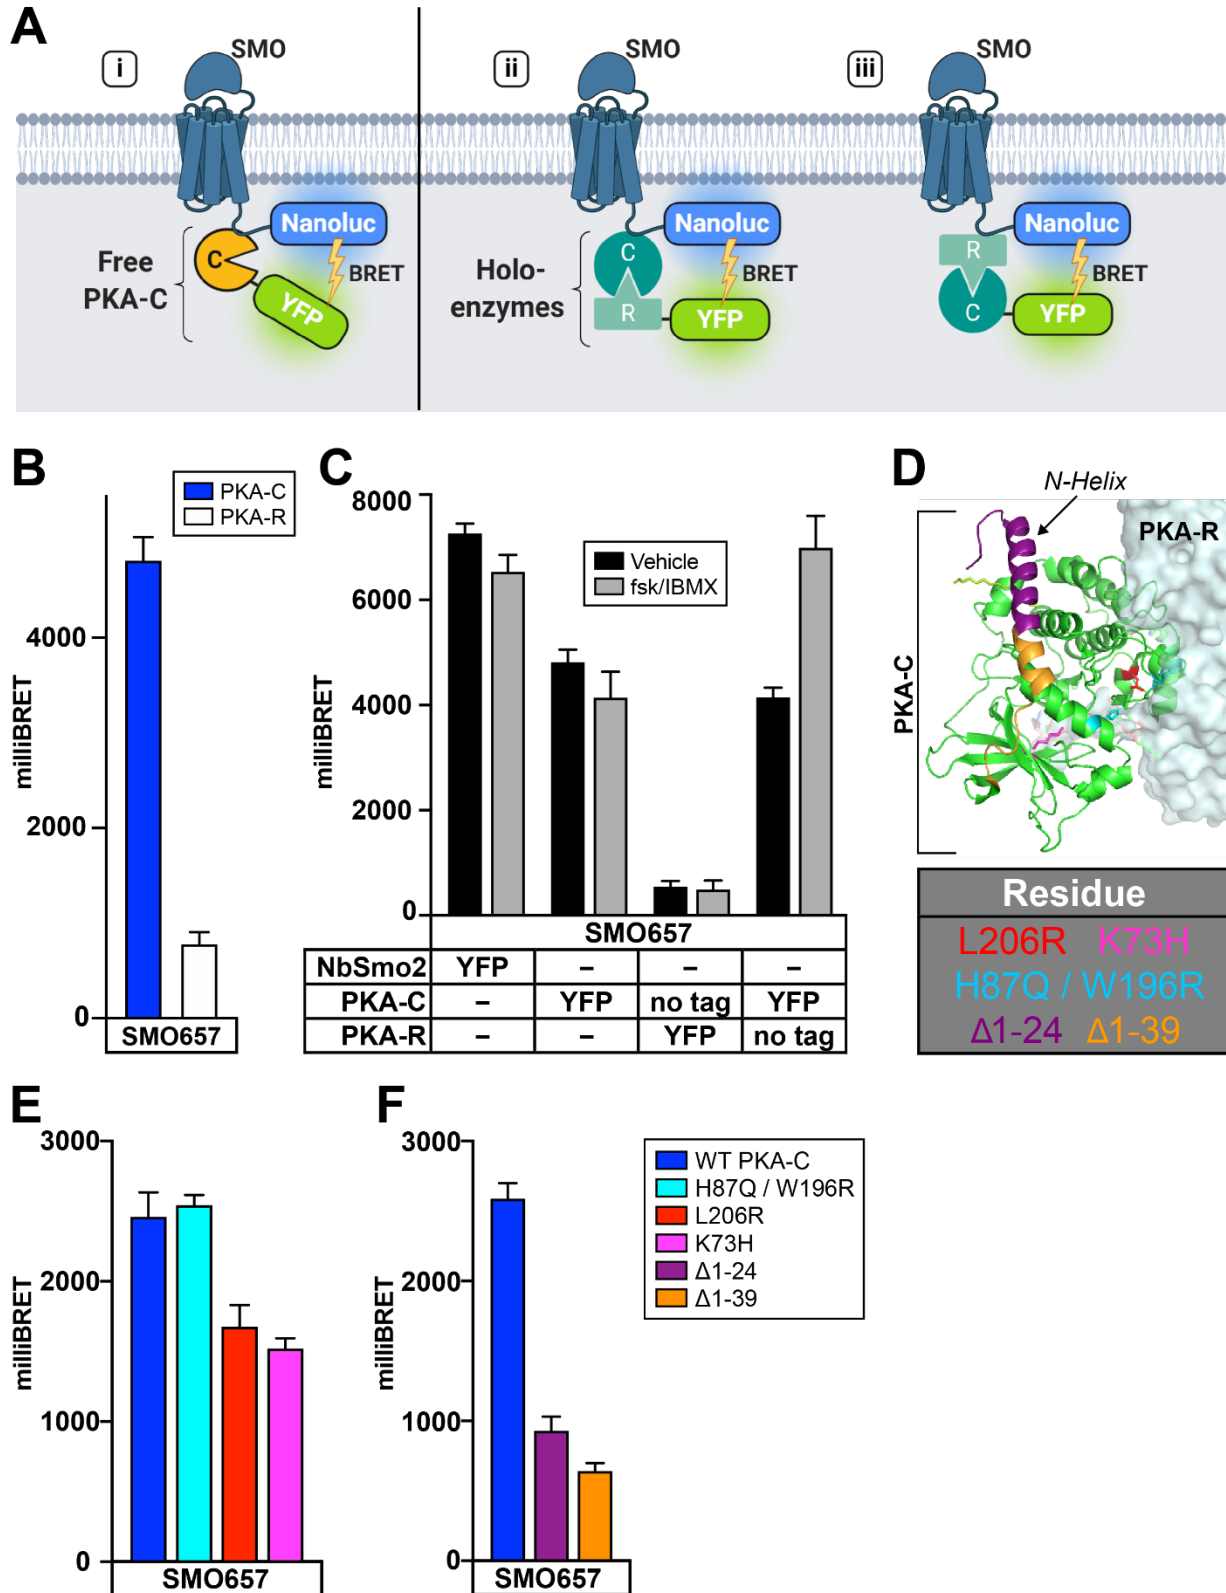

320 **Figure 4: SMO interacts with free PKA-C subunits rather than PKA holoenzymes.**  
321 *(A) Schematic of BRET assays to test whether SMO interacts with (i) free PKA-C, or intact PKA*  
322 *holoenzymes via (ii) PKA-C or (iii) PKA-R subunits. (B) BRET between a SMO657-nanoluc donor*  
323 *and YFP-tagged PKA-C or PKA-R in HEK293 cells. (C) HEK293 cells were transfected with a*  
324 *SMO657-nanoluc donor and untagged or YFP-tagged PKA-C or PKA-R subunits, as described in*  
325 *the table. To stimulate cAMP production, cells were treated for four hours with forskolin (10  $\mu$ M)*  
326 *+ the phosphodiesterase inhibitor isobutylmethylxanthine (IBMX, 1 mM), which blocks cAMP*  
327 *degradation, prior to BRET measurements. (D) Structure of PKA holoenzyme (PDB: 4X6R). Key*  
328 *PKA-C residues are colored in the structure and indicated in the table (below). (E) BRET between*  
329 *SMO and PKA-C harboring mutations in various regions of the PKA-R binding interface*  
330 *(H87Q/W196R or L206R) or the active site (K73H). (F) BRET between SMO and PKA-C harboring*  
331 *deletions of the first 24, or all 39, amino acids from the N-tail. Data are reported as milliBRET*  
332 *ratios and background-subtracted as in Figure 3 (n = 3-6 biological replicates per condition. Error*  
333 *bars = s.e.m.) See Supplemental Table 1 for statistical analysis.*  
334



335 **SMO / PKA-C interactions depend on SMO and GRK2/3 activity**

336 PKA phosphorylation of GLI in Hh pathway-responsive tissues or CREB in our heterologous cell  
337 assays (**Figure 1**) depends on SMO activity state: it is low when SMO is active, and high when  
338 SMO is inactive. One way for PKA phosphorylation of these substrates to reflect SMO activity  
339 would be for SMO / PKA-C interactions to increase when SMO is active and decrease when SMO  
340 is inactive.

341  
342 We tested this hypothesis by using BRET to examine the impact of small molecule SMO ligands  
343 on SMO interactions with either PKA-C or NbSmo2 (which strongly prefers to bind active SMO  
344 over inactive SMO (**Figure 2—figure supplement 1A,B**)). In these experiments, we measured  
345 interactions over the full dynamic range of SMO activity by comparing effects of a high-efficacy  
346 SMO agonist, SAG21k, to those of KAADcyc. SMO BRET with PKA-C or NbSmo2 was high with  
347 SAG21k but decreased with KAADcyc (**Figure 5A and Figure 5—figure supplement 1D**). SMO  
348 modulators produced similar effects on PKA-C or NbSmo2 membrane colocalization (**Figure**  
349 **5B,C and Figure 5—figure supplement 1A-C**). In these experiments, SMO modulators exerted  
350 somewhat weaker effects on PKA-C than they did on the NbSmo2 positive control. Nevertheless,  
351 these effects may be highly relevant under physiological conditions in the presence of other  
352 regulatory influences (see “Discussion”). In any event, these data indicate that SMO / PKA-C  
353 interactions vary with SMO activity state – they are significantly enhanced when SMO is active.

354  
355 In considering how activation of SMO leads to enhanced PKA-C binding, GRK family kinases  
356 emerged as leading candidates for controlling this process. GRKs selectively phosphorylate the  
357 active states of many GPCRs on their intracellular domains, thereby triggering interactions with  
358 cytoplasmic regulatory factors (Evron et al., 2012; Homan and Tesmer, 2014; Komolov and  
359 Benovic, 2018). In keeping with this paradigm, PKA-C binds active SMO via its pCT. Moreover,  
360 GRK2 can phosphorylate active SMO (Chen et al., 2004, 2011), and inhibition of GRK2 and GRK3  
361 strongly disrupts Hh signal transduction (Breslow et al., 2018; Meloni et al., 2006; Philipp et al.,  
362 2008; Pusapati et al., 2017, 2018; Zhao et al., 2016).

363  
364 We tested the effect of GRK2/3 activity on SMO / PKA-C colocalization and binding. The selective  
365 GRK2/3 inhibitor Takeda Compound 101 (Cmpd101) inhibited PKA-C colocalization (**Figure 5B,**  
366 **C, and Figure 5—figure supplement 1B**) and BRET (**Figure 5D and Figure 5—figure**  
367 **supplement 1E**) with SMO. As a control, Cmpd101 did not affect BRET with NbSmo2 (**Figure**  
368 **5D and Figure 5—figure supplement 1E**). Finally, Cmpd101, like KAADcyc, reversed SMO-  
369 dependent inhibition of the CREB reporter (**Figure 5E**). These findings show that GRK  
370 phosphorylation mediates the activity-dependent binding of SMO to PKA-C.

371

372 **Figure 5**

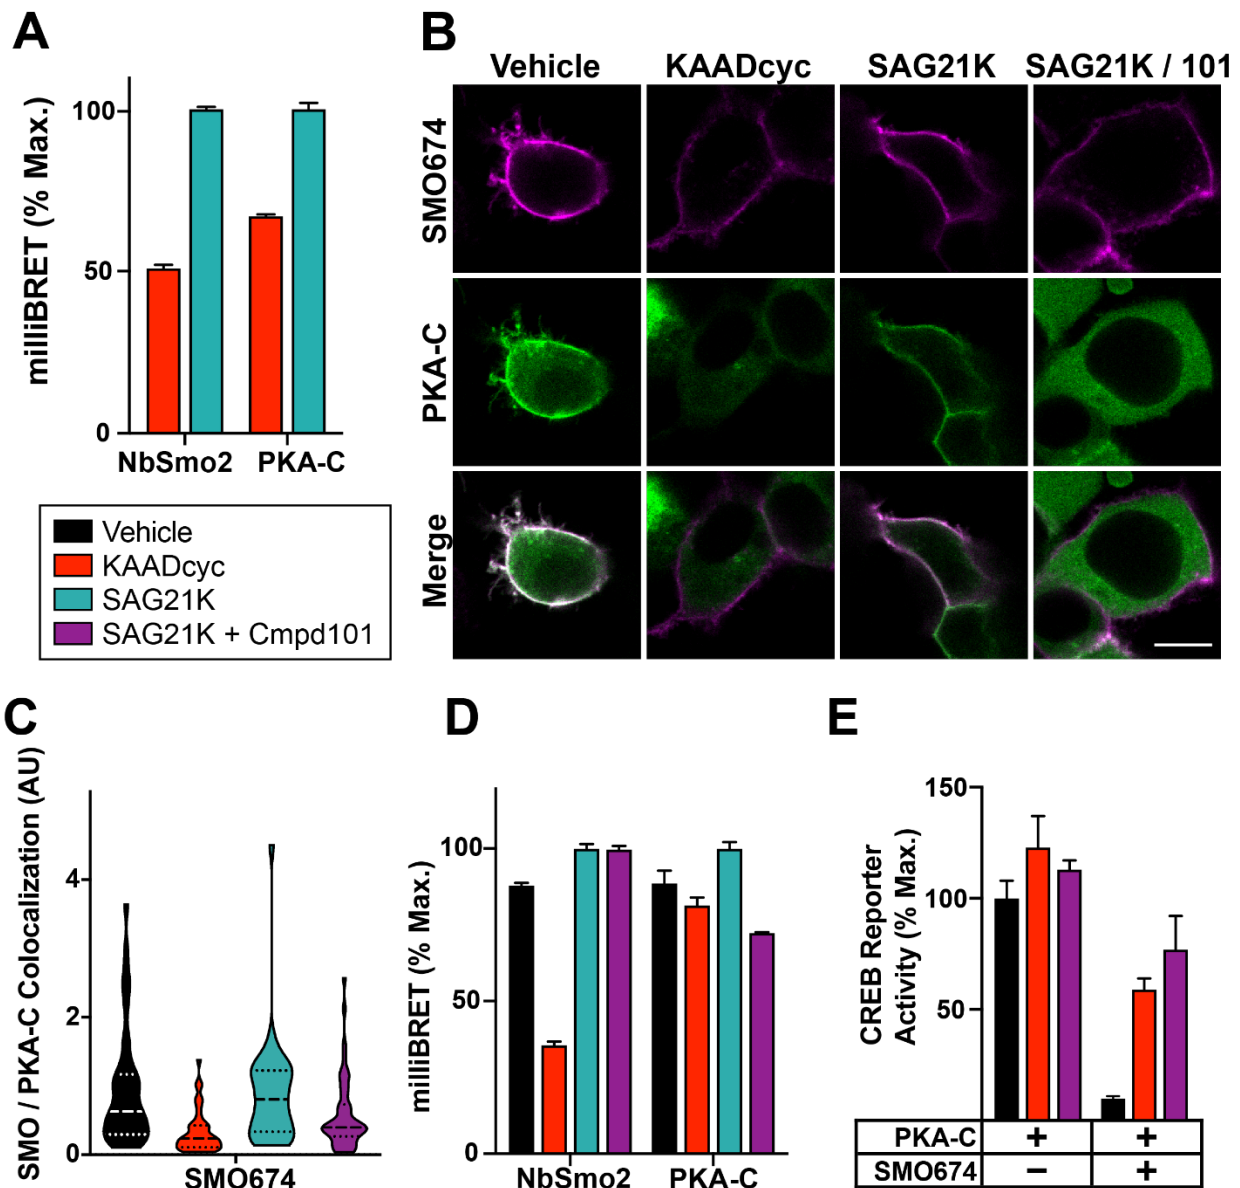

373 **Figure 5: SMO / PKA-C interactions depend on SMO and GRK2/3 activity.**  
 374 (A) HEK293 cells transfected with SMO657-nanoluc and PKA-C-YFP were treated with SMO  
 375 antagonist KAADcyc (1  $\mu$ M) or agonist SAG21K (1  $\mu$ M) for one hour prior to BRET measurements.  
 376 (B) Images of HEK293 cells transfected with FLAG-tagged SMO674 (magenta) and YFP-tagged  
 377 PKA-C (green), and treated with vehicle, KAADcyc (300 nM), or SAG21K (100 nM) alone or with  
 378 the GRK2/3 inhibitor Cmpd101 (30  $\mu$ M). Scale bar = 10  $\mu$ m. (C) Quantification of colocalization  
 379 between SMO and PKA-C for the experiment in (B) (see "Methods"). (D) HEK293 cells were  
 380 transfected with SMO657-nanoluc and YFP-tagged versions of either NbSmo2 or PKA-C, and  
 381 treated with vehicle, KAADcyc (1  $\mu$ M), or SAG21K (1  $\mu$ M) alone or with Cmpd101 (30  $\mu$ M) for four  
 382 hours. (E) Effect of KAADcyc (1  $\mu$ M) or Cmpd101 (30  $\mu$ M) on SMO inhibition of the CREB reporter

383 *in HEK293 cells. For (A), and (D), BRET was normalized to 100%, which represents the maximum*  
384 *BRET signal from each set of cells treated with SAG21k. For (E), CREB reporter was normalized*  
385 *to 100%, which reflects reporter activation from PKA-C-transfected cells treated with vehicle. Data*  
386 *in (A), (D), (E): n = 3-6 biological replicates per condition. Error bars = s.e.m.). Data in (C): N =*  
387 *119-216 cells per condition pooled from two or more independent experiments. See Supplemental*  
388 *Table 1 for statistical analysis.*  
389

390 **GRK2/3 phosphorylation of conserved SMO pCT residues mediates PKA-C binding**

391 A parsimonious interpretation of the Cmpd101 results is that PKA-C recruitment to SMO is  
392 dependent on GRK2/3-mediated phosphorylation of the SMO intracellular domains. To test this  
393 hypothesis, we identified GRK2/3 phosphorylation sites in SMO purified from HEK293 cells  
394 stimulated with SAG21k, KAADcyc, or Cmpd101. We then tested whether alanine substitution of  
395 the corresponding residues blocked PKA-C interactions.

396  
397 Phosphoprotein staining of purified SMO samples revealed SMO activity- and GRK2/3-dependent  
398 phosphorylation that required the pCT (**Figure 6A**). Quantitative mass spectrometry (MS)  
399 identified seven sites within three clusters (*a*: S560, *b*: S594 / T597 / S599, and *c*: S642 / T644 /  
400 T648) exhibiting phosphorylation that depended on SMO and GRK2/3 activity, along with two  
401 constitutive phosphorylation sites (S578, S666) (**Figure 6B,C and Figure 6—figure supplement**  
402 **1A,B**). Several of these sites are evolutionarily conserved (Maier et al., 2014), particularly in  
403 vertebrates (**Figure 6B**). Four of these sites (S560, S578, T644, and T648) were not detected in  
404 previous studies of vertebrate SMO phosphorylation, which involved *in vitro* kinase assays with  
405 soluble SMO CT fragments (Chen et al., 2011). In addition, we did not observe phosphorylation  
406 at four of the previously mapped sites (S592, S615, S619, S620) (Chen et al., 2011), despite  
407 efficient MS coverage of all SMO intracellular regions (data not shown). No SMO activity-  
408 dependent GRK2/3-independent phosphorylation events, or vice versa, were detected,  
409 suggesting that GRK2/3 are the principal kinases that recognize and phosphorylate active SMO  
410 in our experiments.

411  
412 Mutation of the seven SMO activity- and GRK2/3-dependent phosphorylation sites to alanine  
413 substantially reduced SMO phosphoprotein staining (**Figure 6A**) and SMO BRET with PKA-C  
414 (**Figure 6D**). As a control, BRET between SMO and NbSmo2 occurred at nearly wild-type levels  
415 (**Figure 6D**). These data indicate that GRK2/3 phosphorylation sites in the pCT domain are critical  
416 for PKA-C interaction.

417

418 **Figure 6**  
419

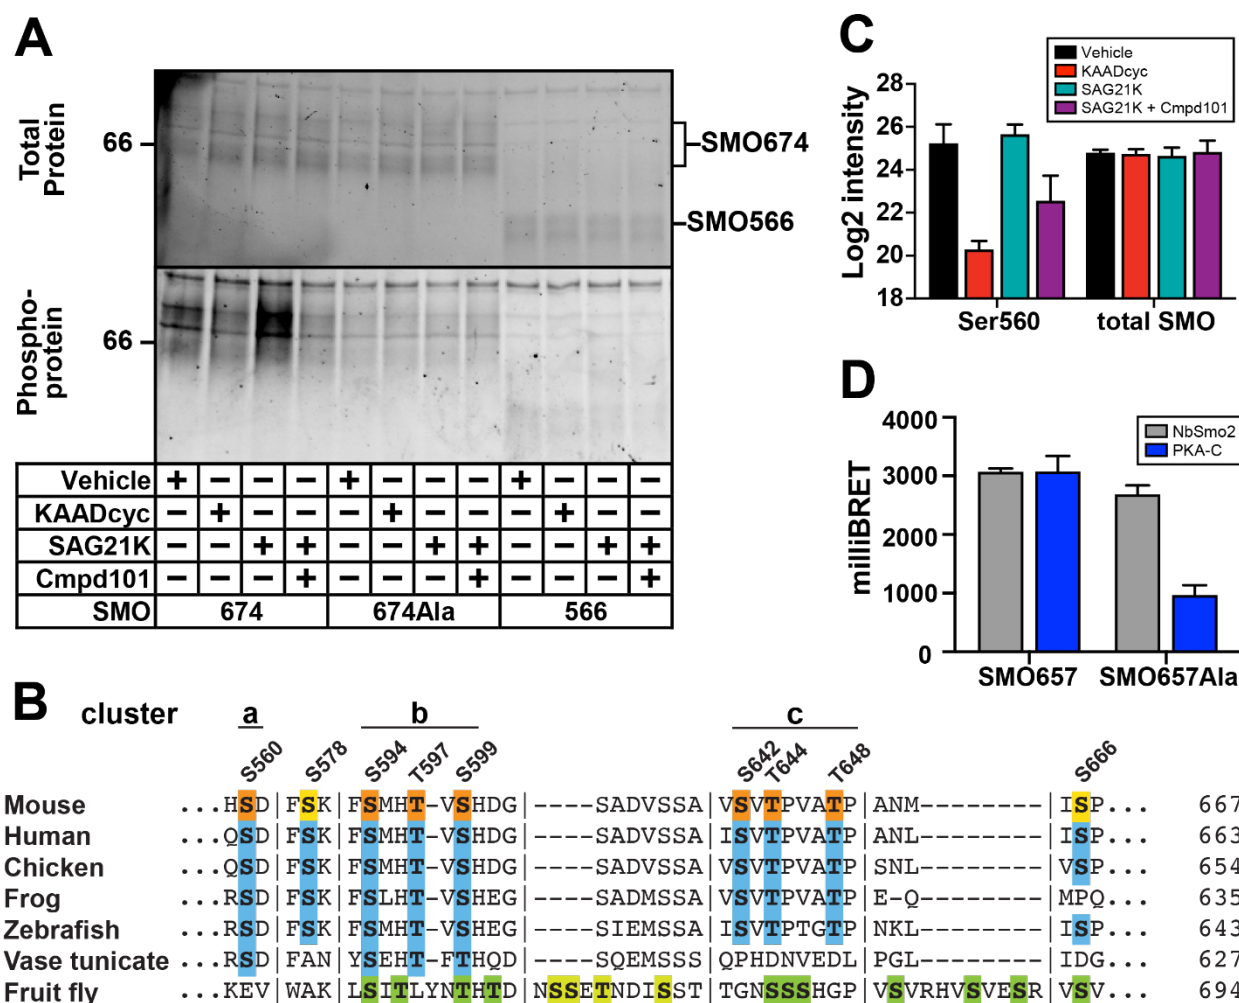

420 **Figure 6: GRK2/3 phosphorylation of conserved SMO pCT residues mediates PKA-C**  
421 **binding.**

422 (A) HEK293 cells expressing GRK2 and either SMO674 (lanes 1-4), SMO674Ala, which carries  
423 mutations in seven GRK2/3 phosphorylation sites (lanes 5-8), or SMO566 (lanes 9-12). Following  
424 treatment with SMO modulators or Cmpd101, SMO was isolated via FLAG affinity  
425 chromatography and total protein or phosphoprotein was visualized using Stain-Free imaging or  
426 Pro-Q Diamond staining, respectively. Although GRKs often phosphorylate GPCRs on the  
427 intracellular loops of their 7TM domains (Homan and Tesmer, 2014; Komolov and Benovic, 2018),  
428 we did not observe phosphorylation within this region of SMO via phosphoprotein staining (A) or  
429 MS (data not shown). Molecular masses are in kDa. (B) Clusters of phosphorylated residues  
430 identified by MS are labeled above the sequence of mouse SMO. Orange indicates  
431 phosphorylation that depends on SMO and GRK2/3 activity, while yellow indicates constitutive  
432 phosphorylation. Alignment with SMO from other species reveals sequence conservation (blue),

433 particularly among vertebrates. Green indicates GRK phosphorylation sites previously mapped in  
434 *Drosophila Smo* (ref). Vertical lines indicate breaks in sequence. See Figure 6—figure supplement  
435 1A for complete alignment. **(C)** MS-based quantification of: Left: phosphorylation at S560, one of  
436 the activity- and GRK2/3-dependent sites in the SMO pCT. Right: total SMO protein in each  
437 sample. “Log<sub>2</sub> intensity” is a measurement of the abundance of phosphosites (left) or total protein  
438 (right), derived from model-based estimation in MSstats which combines individual peptide  
439 intensities (see “Methods”). **(D)** BRET between PKA-C and wild-type SMO674 or SMO674Ala.  
440 Data in (C): *n* = 3 biological and 3 technical replicates per condition. Data in (D): *n* = 3-6 biological  
441 replicates per condition. Error bars = s.e.m.). See Supplemental Table 1 for statistical analysis.  
442  
443

#### 444 **Hh signal transduction is blocked when SMO cannot bind PKA-C**

445 Our heterologous cell model enabled identification and mapping of a GRK2/3-dependent SMO /  
446 PKA-C interaction that interferes with PKA phosphorylation of a heterologous soluble transcription  
447 factor. To address whether this mechanism contributes to GLI activation in the Hh pathway, we  
448 turned to two models of Hh signal transduction: *i*) activation of a GLI transcriptional reporter in  
449 cultured fibroblasts upon treatment with Hh ligands, and *ii*) specification of slow muscle cell  
450 subtypes during zebrafish development, which is exquisitely sensitive to Hh pathway activity  
451 (Eeden et al., 1996; Stickney et al., 2000; Wolff et al., 2003). Transduction of Hh signals in these  
452 models strictly requires SMO, PKA, and GLI (Karlstrom et al., 1999; Lipinski et al., 2008; Taipale  
453 et al., 2000; Tuson et al., 2011; Varjosalo et al., 2006; Wolff et al., 2003), and also depends  
454 strongly on the presence of primary cilia (Haycraft et al., 2005; Huang and Schier, 2009; Kim et  
455 al., 2010; Ocbina and Anderson, 2008).

456  
457 First, we deleted a small stretch of sequence (SMO $\Delta$ 570-581) that lies within a region of the pCT  
458 critical for interaction with PKA-C (**Figure 3C**). This SMO deletion abolishes activation of GLI in  
459 cultured *Smo*<sup>-/-</sup> fibroblasts (Kim et al., 2009; Varjosalo et al., 2006) (**Figure 7A**) without affecting  
460 SMO ciliary localization (Kim et al., 2009). Accordingly, the  $\Delta$ 570-581 deletion severely reduced  
461 SMO BRET with PKA-C (**Figure 7B**). BRET with NbSmo2 was substantially less affected (**Figure**  
462 **7B**), suggesting that the defect in PKA-C interaction does not stem from issues with expression  
463 or ability to assume an active conformation. Thus, SMO $\Delta$ 570-581 fails to bind PKA-C and to  
464 activate GLI.

465  
466 Next, we harnessed our insight that SMO / PKA-C interactions depend on SMO activity and  
467 GRK2/3 phosphorylation to design a different non-PKA-C-binding SMO mutant. The intracellular  
468 region of the SMO 7TM domain changes conformation dramatically upon SMO activation  
469 (Deshpande et al., 2019). This same region is also necessary for recruitment of GRKs to the  
470 active states of other GPCRs (Homan and Tesmer, 2014; Komolov et al., 2017). To assess  
471 whether SMO interactions with PKA-C also required this region, we fused NbSmo2 to the end of  
472 the CT. As a result, NbSmo2 is expected to bind SMO and dissociate minimally, if at all;  
473 interactions with the 7TM domain's intracellular region that involve other proteins, domains of  
474 SMO, or both, will be efficiently blocked (**Figure 7C, left**). SMO-NbSmo2 failed to bind PKA-C,  
475 while a negative control fusion of similar size and expression level, SMO-Nb $\beta$ 2AR80, bound  
476 robustly (**Figure 7C, right**). In cultured *Smo*<sup>-/-</sup> fibroblasts, SMO-NbSmo2 also failed to stimulate  
477 GLI-dependent transcription in response to Hh ligands, whereas SMO-Nb $\beta$ 2AR80 still mediated  
478 strong transcriptional responses (**Figure 7D**). In zebrafish, expression of mRNA encoding wild-  
479 type SMO or SMO-Nb $\beta$ 2AR80 restored Hh pathway-dependent muscle development to *smo*<sup>-/-</sup>  
480 embryos, whereas SMO-NbSmo2 did not (**Figure 7E**). Control experiments confirmed that SMO-  
481 NbSmo2 and SMO-Nb $\beta$ 2AR80 accumulate normally in cilia in response to SMO activation (data  
482 not shown). These findings argue that blockade of Nb-binding regions in the SMO 7TM domain  
483 hinders interactions with PKA-C and activation of GLI. They also further establish a correlation  
484 between SMO / PKA-C binding and GLI activation.

485

486 Lastly, we mutated the seven critical GRK2/3-dependent phosphorylation sites in SMO. These  
487 mutations not only dramatically impaired GLI transcription in cultured *Smo*<sup>-/-</sup> fibroblasts (**Figure**  
488 **7F**), but also failed to restore normal muscle specification to *smo*<sup>-/-</sup> zebrafish embryos (**Figure**  
489 **7G**).

490

491 Taken together, these results highlight an important role for GRK2/3-mediated SMO / PKA-C  
492 binding and subsequent PKA-C membrane sequestration in controlling GLI activation in cellular  
493 models as well as embryonic patterning *in vivo*.

494



495 **Figure 7**

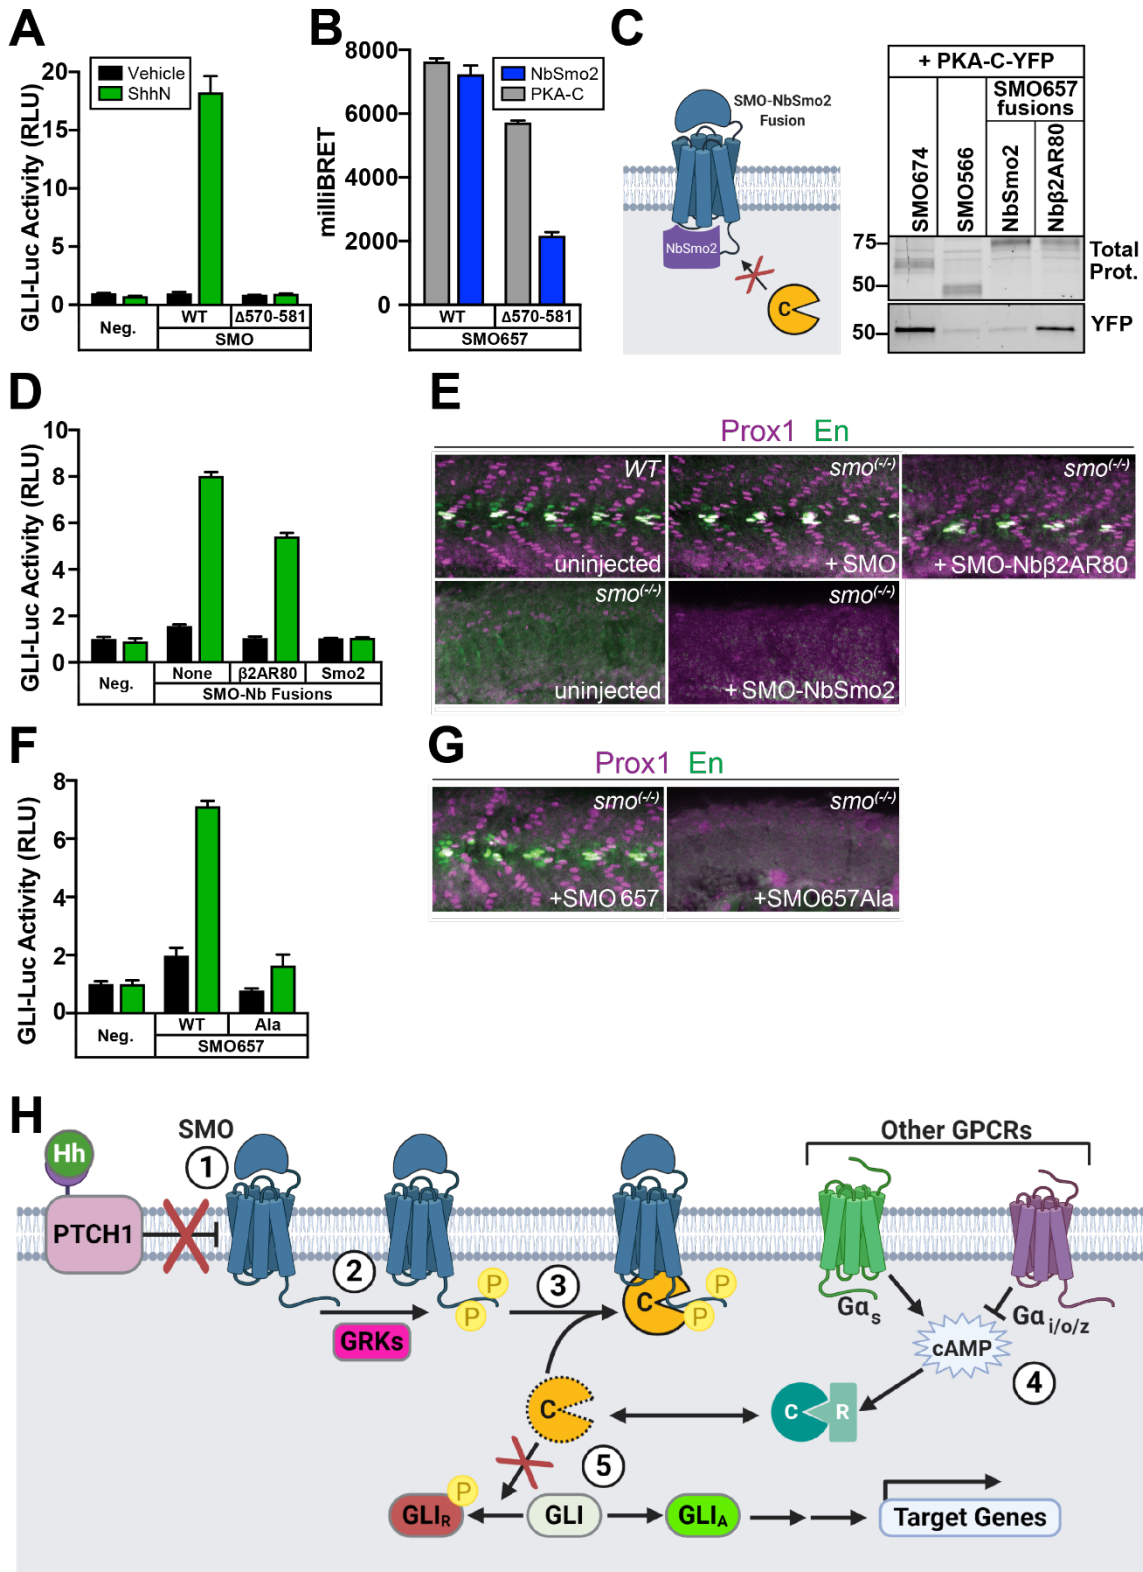

496 **Figure 7: Hh signal transduction is blocked when SMO cannot bind PKA-C.**  
497 (A) *GLI* transcriptional reporter assay in *Smo*<sup>-/-</sup> mouse embryonic fibroblasts (MEFs) expressing  
498 wild-type SMO or SMO $\Delta$ 570-581, treated with control or Sonic hedgehog (*Shh*N) conditioned  
499 medium. GFP serves as a negative control (“Neg.”). RLU = relative luciferase units. (B) BRET in  
500 HEK293 cells between nanoluc-tagged wild-type or  $\Delta$ 570-581 forms of SMO657 as donor, with  
501 YFP-tagged NbSmo2 or PKA-C as acceptor. (C) Left: Schematic of SMO-NbSmo2 fusion,  
502 predicted to block interactions with SMO that require the intracellular face of the 7TM domain.  
503 Right: YFP-tagged PKA-C was coexpressed in HEK293 cells with FLAG-tagged SMO674 (lane  
504 1), SMO566 (lane 2), SMO657-NbSmo2 (lane 3), or SMO657-Nb $\beta$ 2AR80 (lane 4). Following cell  
505 lysis and FLAG purification of SMO complexes, samples were separated on SDS-PAGE.  
506 Fluorescence scans of total protein (top) and YFP (bottom) in FLAG eluates are shown. Note  
507 that DSP crosslinker was not used in this experiment; thus, copurification of PKA-C was less  
508 efficient than in Figure 2F. Molecular masses are in kDa. (D) *GLI* transcriptional reporter assay in  
509 *Smo*<sup>-/-</sup> MEFs expressing fusions to NbSmo2 or Nb $\beta$ 2AR80. Non-Nb-fused SMO (“none”) serves  
510 as a positive control. (E) Confocal images of whole-mount wild-type zebrafish embryos or *smo*<sup>-/-</sup>  
511 mutants injected with mRNAs encoding either wild type SMO, SMO-Nb $\beta$ 2AR80, or SMO-  
512 NbSMO2. Embryos 26 hours post-fertilization were fixed and stained with antibodies against  
513 *Prox1* (magenta) or *Engrailed* (*En*, green) to mark populations of muscle fiber nuclei. (F) *GLI*  
514 transcriptional reporter assay in *Smo*<sup>-/-</sup> MEFs expressing wild-type SMO657 (“WT”) or  
515 SMO657Ala. (G) Zebrafish were injected with mRNAs encoding wild-type SMO657 or  
516 SMO657Ala, then stained for muscle fiber nuclei as described in (E). (H) Proposed model for  
517 SMO activation of *GLI* via PKA-C membrane sequestration: (1) Hh proteins bind to and inhibit  
518 *PTCH1*, inducing an activating conformational change in SMO; (2) Active SMO is recognized and  
519 phosphorylated by GRKs; (3) Phosphorylated SMO recruits PKA-C to the membrane, preventing  
520 PKA-C from phosphorylating and inhibiting *GLI*; (4) GPCRs that couple to G $\alpha_s$  (such as GPR161)  
521 or G $\alpha_{i/o/z}$  (perhaps including SMO itself) can raise or lower cAMP levels, respectively, thereby  
522 affecting SMO / PKA-C interactions by regulating the size of the free PKA-C pool. (5) *GLI* is  
523 converted from a repressed (*GLI<sub>R</sub>*) to an active (*GLI<sub>A</sub>*) form and regulates transcription of Hh target  
524 genes. Data in (A), (B),(D), (F): *n* = 3 biological replicates per condition. Error bars = s.e.m. Data  
525 in (E), (G): *n* = 78 (SMO), 61 (SMO-NbSmo2), 63 (SMO-Nb $\beta$ 2AR80), 62 (SMO657), 70  
526 (SMO657Ala), 100 (uninjected). See Supplemental Table 1 for statistical analysis.

527  
528

529 **DISCUSSION:**

530

531 We have identified and characterized a novel interaction between vertebrate SMO and PKA-C,  
532 demonstrated how this recruits PKA-C to membranes, and showed how it can dramatically affect  
533 the activity of PKA-regulated transcription factors as well as GLI-dependent outputs in cultured  
534 cells and *in vivo*. These insights enable a deeper understanding of how Hh signal transduction  
535 orchestrates cell proliferation and differentiation events in nearly all of its biological roles.

536

537 Based on these findings, we propose the following mechanism (**Figure 7H**). In the pathway “off”  
538 state, SMO is inactive and inefficiently binds PKA-C. PKA-C is thus available to phosphorylate  
539 and inactivate GLI. In the pathway “on” state, SMO activation triggers GRK phosphorylation of  
540 the pCT, increasing PKA-C binding and siphoning PKA-C to the membrane. SMO-bound PKA-C  
541 cannot access soluble GLI substrates. This leads to loss of inhibitory GLI phosphorylation, which  
542 could occur via GLI protein turnover (Hui and Angers, 2011; Humke et al., 2010; Niewiadomski et  
543 al., 2013), tonic action of phosphatases on GLI (Zhao et al., 2017), or both.

544

545 Our proposed mechanism helps to explain key aspects of SMO-to-GLI communication not easily  
546 reconciled with existing models. Prior studies have invoked a variety of explanations for how SMO  
547 might activate GLI (Kong et al., 2019), including: *i*) utilizing canonical  $G\alpha_{i/o/z}$  and cAMP-dependent  
548 pathways to inhibit PKA (Ayers and Thérond, 2010); *ii*) controlling ciliary cAMP, and thus PKA-C,  
549 by influencing the ciliary localization of GPR161, a constitutively active GPCR (Mukhopadhyay et  
550 al., 2013); *iii*) interacting with  $\beta$ arrestin1/2 (Kovacs et al., 2008) or Ellis-van Creveld protein 2  
551 (EVC2) (Dorn et al., 2012), which might regulate GLI by as-yet-undefined mechanisms. However,  
552 pharmacological or genetic inactivation of  $G\alpha_{i/o/z}$  signaling does not prevent SMO from activating  
553 GLI (Low et al., 2008; Regard et al., 2013; Riobo et al., 2006). In addition, whether SMO activation  
554 reduces ciliary cAMP remains controversial (Jiang et al., 2019; Moore et al., 2016; Tschaikner et  
555 al., 2020). Finally, mouse knockouts of  $\beta$ arrestin1/2 (Zhang et al., 2010), EVC2 (Zhang et al.,  
556 2015a), or GPR161 (Hwang et al., 2018; Mukhopadhyay et al., 2013; Shimada et al., 2018), fail  
557 to exhibit the severe, widespread developmental defects expected with disruption of core Hh  
558 pathway components (Goodrich et al., 1996; Tuson et al., 2011; Zhang et al., 2001). Therefore,  
559 existing models neither fully explain how SMO activates GLI, nor rule PKA in or out as a mediator  
560 of this process. Our work reveals a route by which SMO can affect PKA substrate phosphorylation  
561 that does not require any of these factors, offering an explanation for prior conflicting  
562 observations.

563

564 **GRKs and Hh signal transduction**

565 Our work also sheds light on how GRKs control Hh signal transduction. Pathway activation  
566 strongly requires these kinases in vertebrates, but their underlying target and mechanism of action  
567 remained poorly defined (Kong et al., 2019; Meloni et al., 2006; Pusapati et al., 2018; Sharpe and  
568 de Sauvage, 2018; Zhao et al., 2016). While GRKs can phosphorylate SMO (Chen et al., 2004),  
569 mutation of the previously mapped GRK sites (Chen et al., 2011) to alanine does not disrupt  
570 embryonic patterning *in vivo* (Zhao et al., 2016). Consequently, it was unknown whether the

571 physiological target of GRKs in the Hh pathway is SMO or a different protein altogether (Kong et  
572 al., 2019; Pusapati et al., 2018; Sharpe and Sauvage, 2018; Zhao et al., 2016). Furthermore,  
573 how GRK phosphorylation of its substrate(s) regulates GLI activity remained unclear. A key  
574 limitation is that prior studies defined GRK sites based largely on *in vitro* kinase assays with  
575 soluble SMO CT fragments (Chen et al., 2011). GRKs lack a strict consensus motif, and capturing  
576 physiological activity-induced phosphorylation of GPCRs requires their 7TM domains to be  
577 embedded in a membrane lipid environment (DeBurman et al., 1996; Inagaki et al., 2012, 2015;  
578 Komolov et al., 2017), making phenotypic interpretation of existing alanine mutants difficult. Here,  
579 we studied phosphorylation of SMO (with an intact 7TM domain) expressed in mammalian cells.  
580 We also used specific pharmacological agents to define the activity- and GRK-dependence of  
581 SMO phosphorylation events. Our analysis revealed several GRK phosphorylation sites in the  
582 pCT that were not previously reported. Mutation of the sites we identified strongly affects GLI  
583 activation in cultured cells and *in vivo*, indicating that GRK phosphorylation of SMO is in fact  
584 critical for Hh signal transduction. Although GRKs may play multiple roles in Hh signal  
585 transduction (Pusapati et al., 2018; Sharpe and De Sauvage, 2018; Zhao et al., 2016), our PKA-  
586 C sequestration model is particularly appealing because it directly links GRK phosphorylation of  
587 SMO to stimulation of GLI.

588

#### 589 **Structural determinants of the SMO / PKA-C complex**

590 SMO activation of GLI requires the pCT domain (Kim et al., 2015; Varjosalo et al., 2006), but for  
591 reasons that have remained incompletely understood. The pCT contains essential ciliary  
592 trafficking motifs (Kim et al., 2015). However, pCT mutations such as  $\Delta 570-581$  disrupt GLI  
593 activation without affecting SMO ciliary trafficking (Kim et al., 2009), indicating that the pCT plays  
594 additional indispensable roles in GLI activation besides controlling SMO ciliary localization. Here  
595 we show that one such function is to bind and sequester PKA-C when SMO and GRK2/3 are  
596 active. Structures of the pCT or of the SMO / PKA-C complex have not yet been reported.  
597 However, our mutational analysis suggests that this complex involves, at minimum, the  
598 phosphorylated pCT of SMO and the N-tail domain of PKA-C. Membrane lipid interactions may  
599 also contribute to these complexes, as the N-tail is myristoylated which can increase PKA-C  
600 membrane association in some settings (Bastidas et al., 2012; Gaffarogullari et al., 2011; Tillo et  
601 al., 2017; Zhang et al., 2015b). Intriguingly, recent structures of non-SMO GPCRs in complex  
602 with  $\beta$ arrestins have also revealed critical interactions with the receptor's phosphorylated  
603 cytoplasmic tail and lipids in the surrounding membrane (Huang et al., 2020; Staus et al., 2020).  
604 Thus, distinct GPCRs may engage a diverse set of downstream effectors, such as  $\beta$ arrestins or  
605 PKA-C, using similar structural principles.

606

#### 607 **SMO control of PKA localization is an evolutionarily conserved rheostat**

608 The Hh pathway controls development and regeneration throughout the animal kingdom (Ingham  
609 et al., 2011), but whether the underlying transduction mechanism is conserved remains a matter  
610 of debate (Huangfu and Anderson, 2006). Recent studies of SMO communication with GLI have  
611 emphasized aspects of the Hh pathway that are uniquely important to mammals but not insects,  
612 such as the primary cilium (Gigante and Caspary, 2020; Goetz and Anderson, 2010; Huangfu and

613 Anderson, 2006). In contrast, the SMO / PKA-C interaction we describe here is conserved in  
614 *Drosophila* (Li et al., 2014; Ranieri et al., 2014). This interaction promotes *Drosophila* Hh pathway  
615 activation in part by titrating PKA-C out of a protein complex that promotes phosphorylation and  
616 inhibition of the GLI ortholog Ci (Li et al., 2014; Ranieri et al., 2014). This action is strikingly  
617 parallel to effects of SMO / PKA-C interactions on CREB reporter activation and GLI-dependent  
618 transcription observed here. Thus, SMO may utilize PKA to communicate with GLI via  
619 mechanisms that are more similar between species than previously appreciated. One  
620 evolutionary advantage to a mechanism based on direct SMO / PKA-C interactions is that it  
621 ensures graded PKA inhibition over a broad range of SMO activity levels. As a result, SMO can  
622 accurately translate differences in amounts of extracellular Hh proteins (via PTCH1 binding and  
623 inactivation) into discrete changes in GLI activity. This is essential for Hh proteins to function in  
624 gradients as concentration-dependent (morphogenetic) signals in the limb bud, neural tube, and  
625 elsewhere. In contrast, with cascades that involve intermediary components present in limiting  
626 amounts, downstream responses may reach maximal levels even when upstream receptors are  
627 not fully activated (Kenakin, 2008), causing a loss of signal fidelity at high levels of receptor  
628 activity.

629

### 630 **The role of the cilium in SMO regulation of PKA activity**

631 In our HEK293 model, SMO activation triggered changes in the interactions, localization, and  
632 activity of a substantial fraction of cellular PKA-C. In contrast, under physiological conditions,  
633 SMO would mainly act on the much smaller pool of PKA-C in the primary cilium. In this manner,  
634 SMO could specifically regulate GLI transcription factors without affecting PKA-dependent  
635 processes elsewhere in the cell (Jiang et al., 2019; Mukhopadhyay et al., 2013; Tschalkner et  
636 al., 2020; Tuson et al., 2011). Upon Hh pathway activation, SMO not only changes conformation  
637 within the cilium (Rohatgi et al., 2009; Wilson et al., 2009), but also accumulates to high levels in  
638 the ciliary membrane (Corbit et al., 2005; Kim et al., 2009; Rohatgi et al., 2007). This increase in  
639 SMO abundance, along with the SMO activity-dependent binding events described in our study,  
640 may synergize to effectively sequester ciliary PKA-C at the membrane and away from GLI  
641 proteins in the interior of the cilium (cilioplasm). Such a process could also involve transfer of  
642 PKA-C out of ciliary protein complexes that facilitate GLI phosphorylation and inhibition, and into  
643 SMO-containing complexes that do not. Curiously, SMO and PKA-C do not appear to overlap  
644 within the cilium in standard immunofluorescence microscopy; PKA-C is enriched at the basal  
645 body of the cilium, while SMO is in the membrane (Barzi et al., 2009; Tuson et al., 2011).  
646 Nevertheless, a recent study, using an elegant strategy to specifically inhibit PKA-C at defined  
647 locations within the cilium, found evidence for a labile pool of cilioplasmic PKA-C that is critical for  
648 GLI regulation (Mick et al., 2015). Along similar lines, PKA-C activity has been detected within the  
649 cilioplasm using a FRET-based sensor of PKA substrate phosphorylation (Moore et al, 2016).  
650 SMO may activate GLI by sequestering this pool of PKA-C via the mechanism described in our  
651 study. In the future, live-cell super-resolution microscopy may enable visualization of cilioplasmic  
652 PKA-C and evaluation of its distribution within the cilium before and after SMO activation.

653

### 654 **SMO control of GLI may require several mechanisms acting in concert**

655 The mechanism we identified likely acts together with other processes to enable SMO activation  
656 of GLI. For example, SMO or other GPCRs (such as GPR161) may still utilize G proteins to set  
657 levels of cAMP, and thus levels of free PKA-C, within a critical range that allows SMO / PKA-C  
658 interactions to affect GLI activity (**Fig. 7H**). Within this range, PKA-C could access GLI when  
659 SMO is inactive but undergo efficient membrane sequestration when SMO is active. This is  
660 consistent with observations that manipulation of cAMP signals, via expression of dominant  
661 negative (non-cAMP-binding) PKA-R constructs or treatment with forskolin (Eeden et al., 1996;  
662 Hammerschmidt et al., 1996; Taipale et al., 2000), strongly increases or decreases GLI activity,  
663 respectively. Along similar lines, knockout of GPR161 elevates Hh pathway activity in some  
664 settings (Hwang et al., 2018; Mukhopadhyay et al., 2013; Pusapati et al., 2018; Shimada et al.,  
665 2018). Thus, a number of processes may cooperate with the SMO mechanism described here to  
666 create a robust PKA-C activity switch. In this regard, while SMO or GRK2/3 modulators exert  
667 modest effects on SMO / PKA-C interactions and colocalization in some of our experiments, they  
668 may dramatically affect PKA-C substrate phosphorylation under physiological conditions where  
669 other regulatory influences are present.

670

#### 671 **GPCR signaling without second messengers**

672 The mechanism we describe here for the Hh pathway may apply more generally to  
673 communication between GPCRs and PKA. These receptors and effectors participate in  
674 numerous signaling cascades that mediate an extraordinarily diverse range of biological  
675 processes (Lefkowitz, 2000, 2002; Scott and Pawson, 2009; Taylor et al., 2013). Yet, it remains  
676 unclear how communication between just two types of signaling molecules can produce such a  
677 vast array of cellular and physiological outputs. Prior studies have focused largely on indirect  
678 modes of GPCR-PKA communication involving G proteins, cAMP, and AKAP adaptors (Lefkowitz,  
679 2002; Scott and Pawson, 2009). In contrast, our study describes an alternative mechanism,  
680 based on direct PKA-C interactions with an active GPCR. This mechanism may act in concert  
681 with classical second-messenger signals to bias phosphorylation of PKA substrates toward or  
682 away from specific subcellular locations. Such receptor-mediated PKA sequestration may  
683 constitute a broader theme among GPCRs in the cilium, as was recently shown for GPR161,  
684 which encodes an AKAP domain in its intracellular C-terminus that binds and recruits PKA-R  
685 subunits to the ciliary membrane (Bachmann et al., 2016). The additional level of spatial regulation  
686 gained from these strategies may allow GPCR-containing pathways throughout the cell to encode  
687 new types of downstream responses, thereby permitting control of an expanded array of biological  
688 outputs.

689

690 **ACKNOWLEDGMENTS:**

691 We thank A. Inoue for providing HEK293 G $\alpha$ -null cells, and S. Lusk and K. Kwan for providing  
692 *smo<sup>hi1640</sup>* zebrafish. We thank D. Julius, M. He, and S. Nakielny for providing feedback on the  
693 manuscript. C.D.A. and I.B.N. acknowledge support from the Undergraduate Research  
694 Opportunities Program at the University of Utah. D.K.S. acknowledges support from the NIH  
695 Developmental Biology Training Grant at the University of Utah (T32HD007491). I.D.  
696 acknowledges support from the Swiss National Science Foundation. N.J.K. and R.H. are  
697 supported by the US Department of Defense Advanced Research Projects Agency (HR0011-19-  
698 2-0020, HR001119S0092-FP-FP-002). A.M. acknowledges support from the Pew Charitable  
699 Trusts. D.J.G. and B.R.M. acknowledge support of funds in conjunction with grant P30CA042014  
700 awarded to Huntsman Cancer Institute and to the NC Program at Huntsman Cancer Institute.  
701 This work was supported by NIH award 1R35GM133672 (B.R.M.) and an ACS Institutional  
702 Research Grant award (B.R.M.).

703

704 **AUTHOR CONTRIBUTIONS:**

705 B.R.M., C.D.A., J.T.H., A.M., R.H., and D.J.G. conceived and designed the project, B.R.M., A.M.,  
706 R.H., N.J.K., and D.J.G. provided overall project supervision. C.D.A. and J.T.H. conducted BRET  
707 experiments. J.T.H. conducted CREB-based reporter studies. D.S.H. conducted cultured cell  
708 imaging experiments. J.Z. conducted SMO / PKA-C copurification experiments. D.K.S. and  
709 D.J.G. conducted zebrafish injections and immunohistochemistry. J.X. and R.H. conducted mass  
710 spectrometry experiments and data analysis. I.D. designed SMO purification constructs and  
711 analyzed SMO-Nb complexes by size exclusion chromatography. A.M. and J.L. purified NbSmo2  
712 and performed FACS-based NbSmo2 binding assays. J.L.C., S.L.S., I.B.N., and B.R.M.  
713 performed GLI-luciferase assays. J.L.C., I.B.N., and M.F.W. analyzed imaging data (with  
714 guidance from D.S.H.). J.T.H. and I.B.N. assembled manuscript figures, and B.R.M. and C.D.A.  
715 wrote the manuscript with input from all authors.

716

717 **DECLARATION OF INTERESTS:**

718 The authors declare no competing interests.

719

720 **SUPPLEMENTAL INFORMATION:**

721

722 **Supplemental information on experimental model system**

723 Hh signal transduction is often studied using GLI transcriptional readouts (Taipale et al., 2000).  
724 These readouts present two major obstacles for determining whether SMO inhibits PKA to  
725 activate GLI. First, GLI transcription is strongly affected by manipulation of either SMO or PKA  
726 (Hui and Angers, 2011; Kong et al., 2019; Taipale et al., 2000), complicating efforts to determine  
727 whether SMO and PKA reside in the same linear pathway or constitute two separate influences  
728 on GLI. Second, during Hh signal transduction, SMO and GLI are subject to elaborate ciliary  
729 trafficking mechanisms (Gigante and Caspary, 2020; Goetz and Anderson, 2010) that are  
730 incompletely understood and difficult to disentangle from the events occurring immediately  
731 downstream of SMO activation. To strip away these potentially confounding factors, we developed  
732 a heterologous HEK293 model for SMO regulation of PKA activity. This approach permits simple,  
733 direct measurements of SMO effects on PKA, independent of ciliary trafficking or other  
734 intermediate steps (Myers et al., 2017). We used CREB transcription to monitor PKA  
735 phosphorylation in HEK293 cells. CREB, like GLI, is a soluble transcription factor regulated by  
736 PKA phosphorylation (although PKA phosphorylation activates CREB but inhibits GLI.) However,  
737 CREB is not known to be subject to the other major mechanisms that regulate GLI activity (Hui  
738 and Angers, 2011; Shaywitz and Greenberg, 1999). Therefore, any effects of SMO on CREB  
739 transcription would provide evidence that SMO can control PKA. In addition, unlike GLI, activation  
740 of CREB transcription factors is not reported to require the primary cilium. As a result, we can  
741 directly study SMO effects on PKA function in the absence of ciliogenesis or ciliary protein  
742 trafficking processes.

743

744

745 **Statistics:**

746 Representative data from at least two independent trials are shown. Data is reported as the mean  
747 of at least three biological replicates with error bars representing standard error of the mean.  
748 Statistical tests were performed as described in Supplemental Table 1.

749



750 **SUPPLEMENTAL FIGURES:**  
 751  
 752 **Figure 1—figure supplement 1**

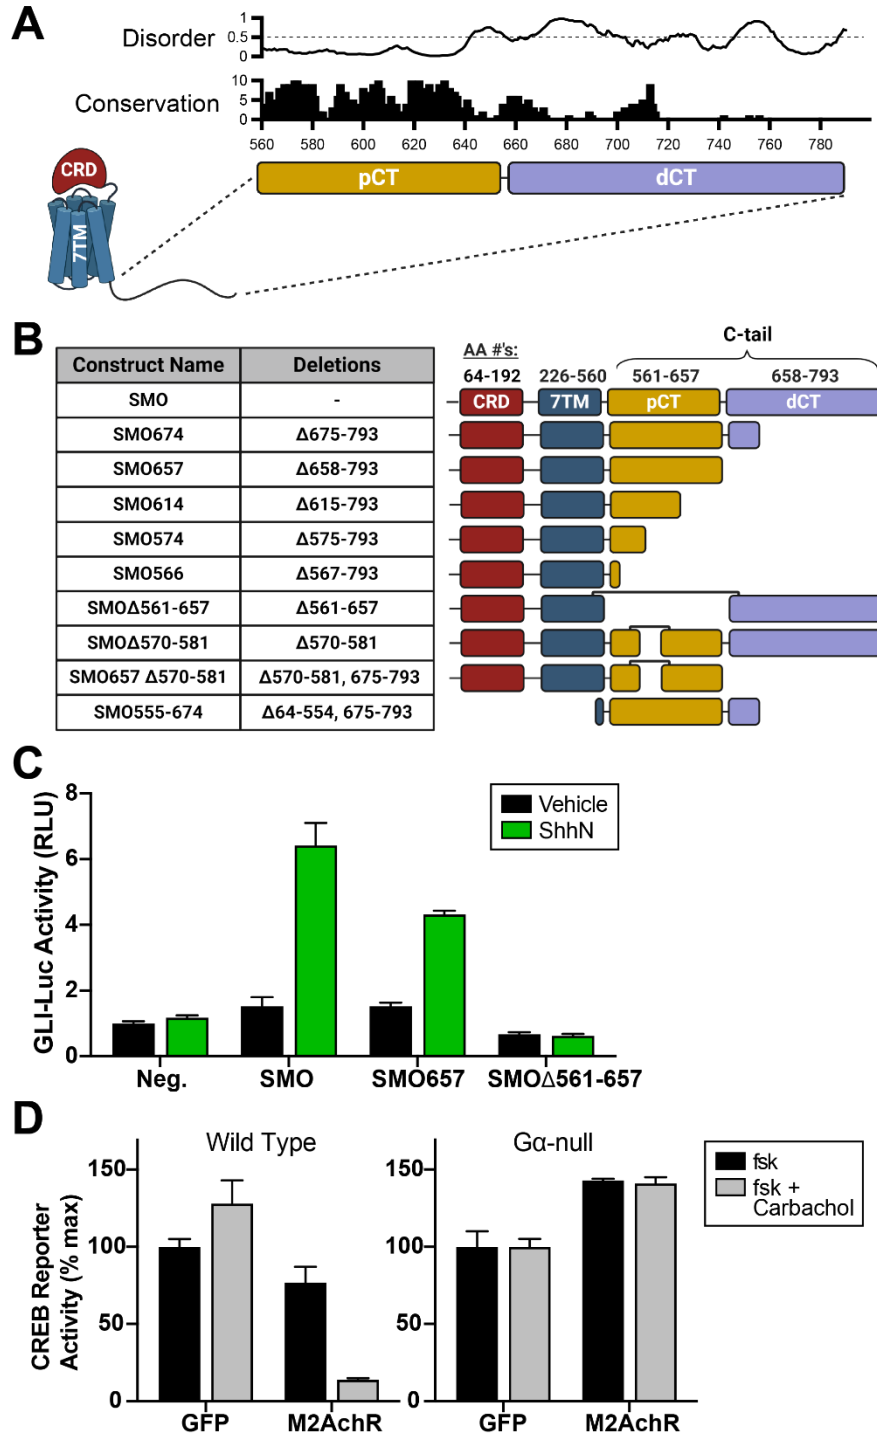

753 **Figure 1—figure supplement 1: SMO expression constructs and controls for CREB-**  
754 **reporter-based PKA activity assay.**

755 (A) Jalview conservation score (0-10) and DISOPRED disorder score (0-1, with values >0.5  
756 indicative of disorder) are plotted on the y-axes, while SMO amino acid numbering is plotted on  
757 the x-axis. Locations of proximal C-tail (pCT, mustard) and distal C-tail (dCT, lavender) are  
758 indicated below the graphs. (B) Table of SMO constructs used in this study. Note that CRD (red)  
759 and 7TM (blue) domains are not drawn to scale. We used SMO657, truncated immediately after  
760 the pCT, for many of our cell-based experiments, based on its ability to recapitulate >70% of the  
761 activity of wild-type SMO in GLI reporter assays (see (C)). However, secondary structure  
762 predictions revealed a conserved region between amino acids 657-674, predicted to be ordered  
763 and to correspond to the end of a helix (data not shown). Because these parameters might help  
764 to increase the biochemical stability of SMO, we extended the construct boundary (SMO674) in  
765 any experiments requiring purification of SMO protein. (C) *Smo*<sup>-/-</sup> mouse embryonic fibroblasts  
766 (MEFs) were transfected with GLI-luciferase reporter plasmid, along with a GFP negative control  
767 (“Neg.”), full-length SMO, or truncation mutants lacking the dCT (SMO657) or pCT (SMOΔ561-  
768 657). Following transfection, cells were stimulated with conditioned medium containing the N-  
769 terminal signaling domain of Sonic hedgehog (ShhN, green) or control, non-ShhN-containing  
770 conditioned medium (vehicle, black). RLU = relative luciferase units. (D) Wild type (left) or Gα-null  
771 (right) HEK293 cells transfected with GFP (negative control) or M2AChR expression plasmids,  
772 stimulated with forskolin (black, 500 nM for wild-type cells, 80 μM for Gα-null cells) in the presence  
773 or absence of carbachol (gray, 3 μM). Note that substantially less forskolin is needed to induce  
774 cAMP signals in wild-type HEK293 cells compared to Gα-null cells due to the presence in the  
775 former of Gα<sub>s</sub>, which binds to and sensitizes adenylyl cyclase (AC) to forskolin treatment (A. Inoue,  
776 personal communication.) In addition, basal reporter activity in Gα-null cells is higher following  
777 M2AChR expression, but the interpretation of this effect is uncertain because it is not altered by  
778 treatment with carbachol. Data are normalized to 100%, which reflects reporter activation from  
779 PKA-C-transfected cells treated with vehicle (n = 3 biological replicates per condition, error bars  
780 represent s.e.m.). See Supplemental Table 1 for statistical analysis.

781  
782

783 **Figure 2—figure supplement 1**

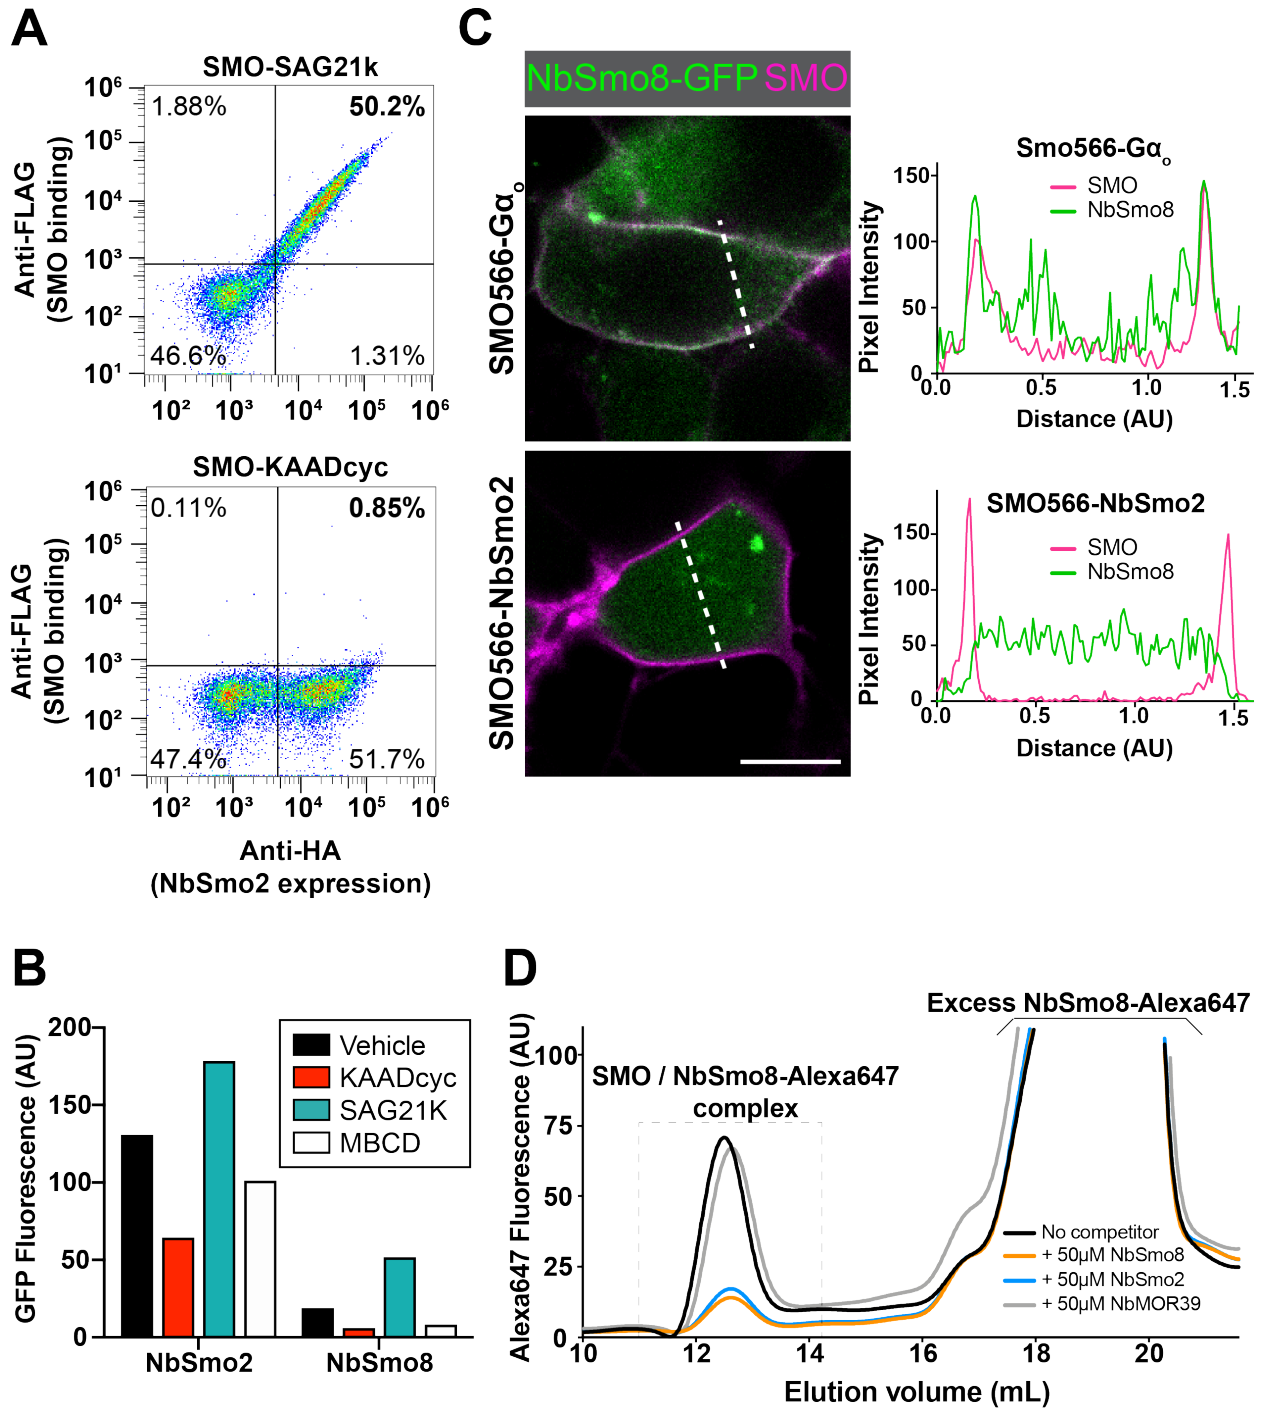

784  
785

786 **Figure 2—figure supplement 1: Confocal imaging line scans and Nb2 selection.**

787 **(A)** Binding of NbSmo2, displayed on the surface of yeast (Deshpande et al., 2019), to purified,  
788 detergent-solubilized SMO-agonist (SAG21k) complexes or SMO-antagonist (KAADcyc)  
789 complexes in solution, was assessed by flow cytometry. Note that this experiment used SMO566,  
790 which lacks the entire cytoplasmic tail. **(B)** FLAG-tagged SMO566-G $\alpha_o$  was expressed in HEK293  
791 cells alone or with GFP-tagged NbSmo2, NbSmo8, or Nb $\beta$ 2AR80. Following treatment with SMO  
792 agonist (SAG21k, 1  $\mu$ M), antagonist (KAADcyc, 1  $\mu$ M), or methyl-beta-cyclodextrin (MBCD, 8 mM,  
793 which extracts SMO sterol agonists from membranes (Myers et al., 2013)), SMO-Nb complexes  
794 were isolated from detergent-solubilized cells via FLAG affinity chromatography and Nb levels  
795 measured via GFP fluorescence quantification. Ratios of GFP fluorescence in FLAG eluates,  
796 normalized to GFP fluorescence in each lysate before affinity chromatography, are reported. **(C)**  
797 NbSmo8-GFP colocalization with SMO566-NbSmo2 fusion at the cell membrane. The presence  
798 of NbSmo2 is predicted to prevent binding of NbSmo8 to SMO if the Nbs bind to overlapping  
799 epitopes. SMO566-G $\alpha_o$  serves as a positive control. Line scan analysis is shown to the right of  
800 each merged image, with a dotted line indicating the location of the scan. **(D)** In vitro binding of  
801 Alexa647-labeled NbSmo8 to SMO566 in the presence of non-fluorescent NbSmo2 competitor,  
802 as assessed by fluorescence detection size exclusion chromatography. Non-fluorescent NbSmo8  
803 or NbMOR39 (which binds a non-SMO GPCR (Huang et al., 2015)) serve as positive and negative  
804 controls for NbSmo8 competition binding, respectively.

805

806

807 **Figure 2—figure supplement 2**

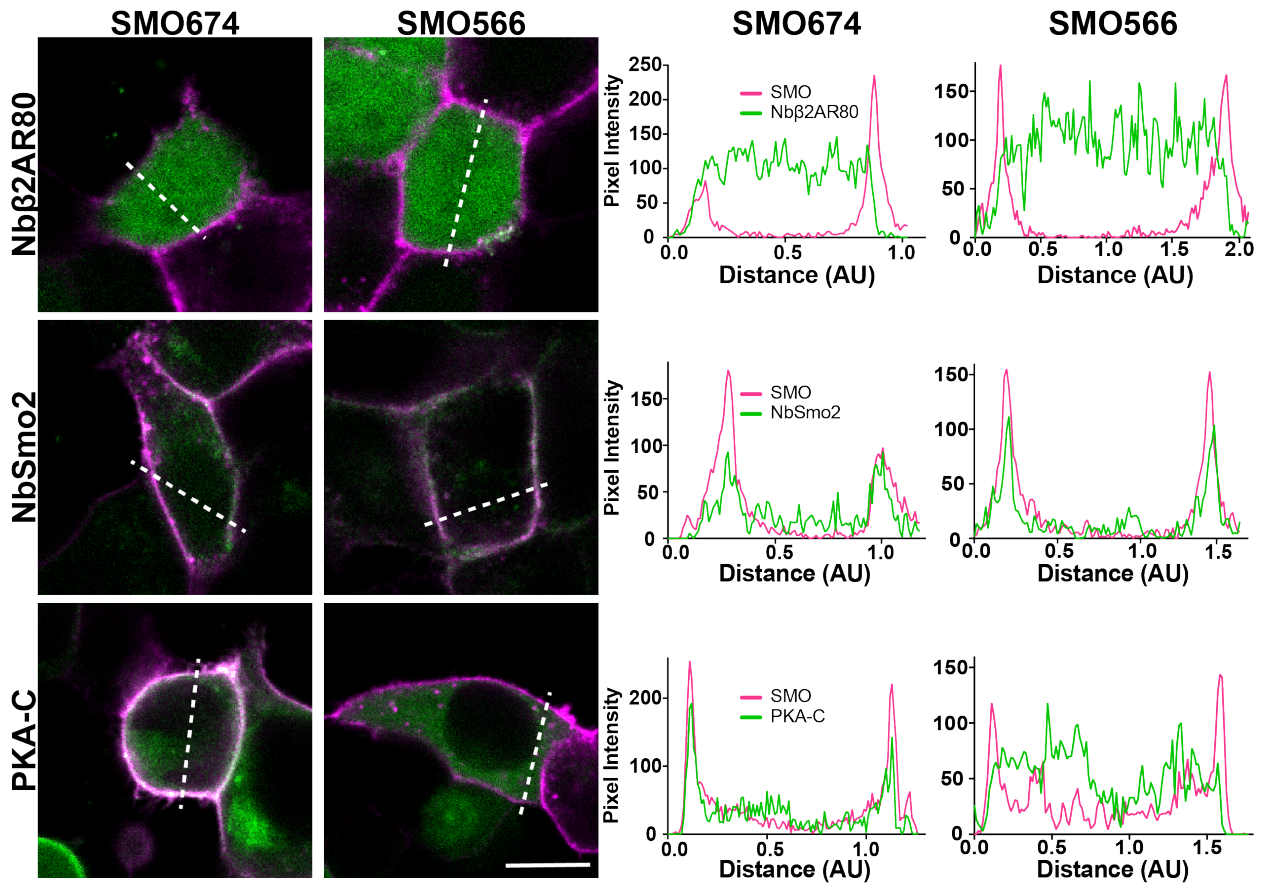

808

809 **Figure 2—figure supplement 2: Line scans.**

810 *Line scans for colocalization images in **Figure 2A** and **Figure 2B**. Colors are the same as*

811 *described in the main figure panels. Dotted line indicates location of the scan.*

812

813

814 **Figure 3—figure supplement 1**

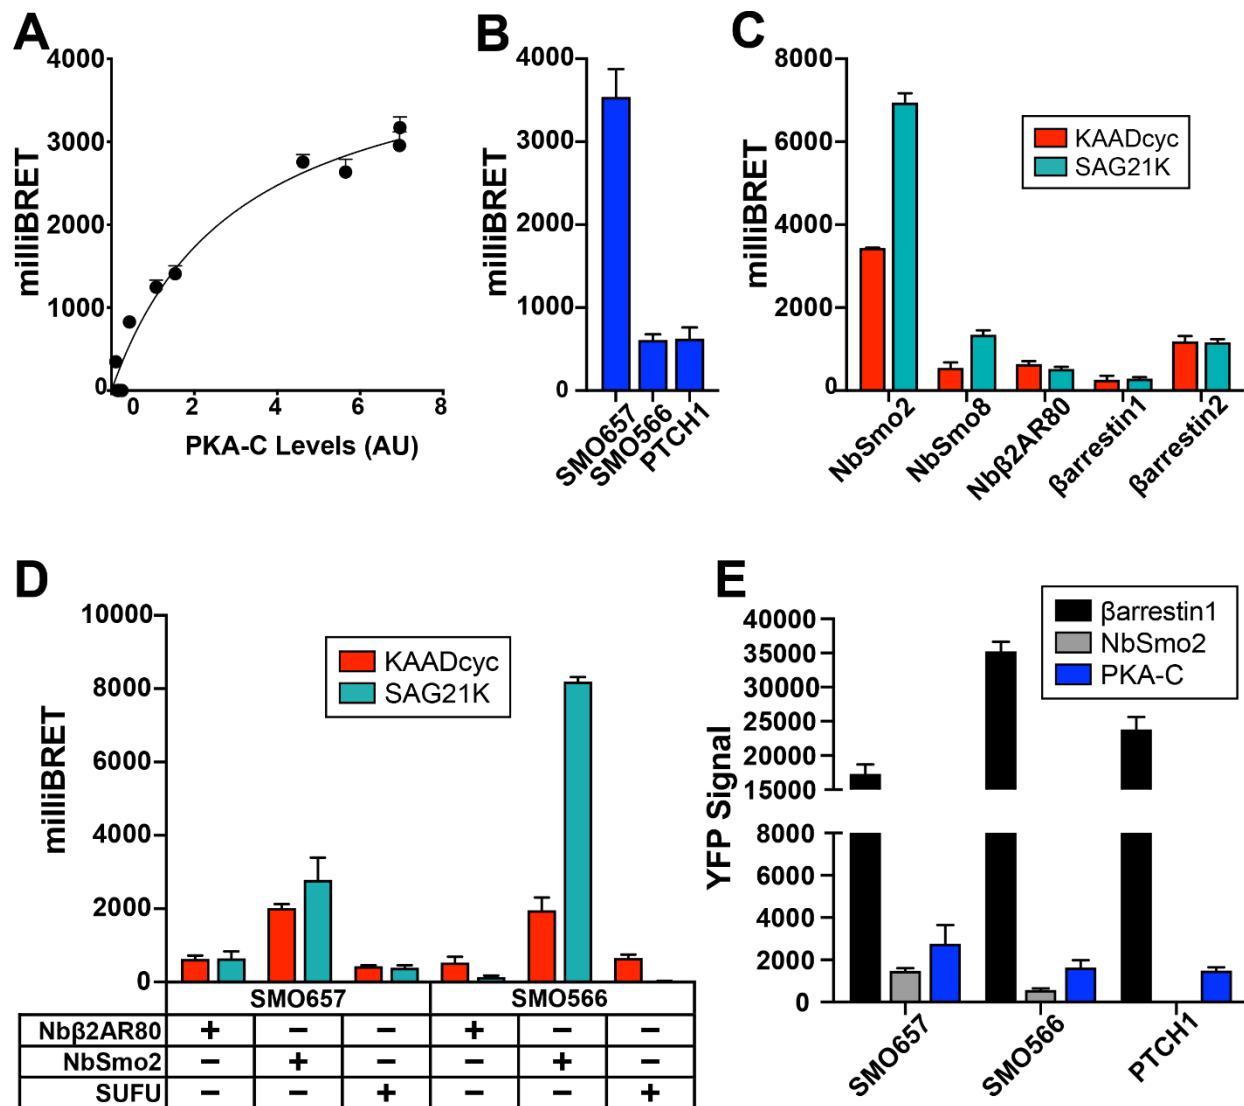

815  
 816 **Figure 3—figure supplement 1: Controls for BRET and SMO / PKA-C BRET studies.**  
 817 (A) Saturation analysis of BRET between SMO and PKA-C. A fixed amount of SMO BRET donor  
 818 was cotransfected with increasing amounts of PKA-C BRET acceptor. The x-axis reflects levels  
 819 of PKA-C, normalized to levels of SMO as described in Methods (AU = arbitrary units), and the y-  
 820 axis reflects the BRET ratio (in milliBRET units). (B) BRET between YFP-tagged PKA-C and  
 821 nanoluc-tagged SMO657, SMO566, or PTCH1. (C) SMO BRET with NbSmo2, NbSmo8,  
 822 Nbβ2AR80, βarrestin-1, or βarrestin-2. To determine if BRET depends on SMO activity, cells were  
 823 treated for 1 hr. with SAG21K (1μM) or KAADcyc (1μM). (D) BRET using SMO657 or SMO566  
 824 as donors and Nbβ2AR80, NbSmo2, or SUFU as acceptors, performed as described in (C). (E)  
 825 Levels of BRET acceptor for the experiment shown in **Figure 3B**, measured as YFP fluorescence

826 *prior to addition of nanoluc substrate, with background subtracted. See Supplemental Table 1 for*  
827 *statistical analysis.*  
828

829 Figure 3—figure supplement 2

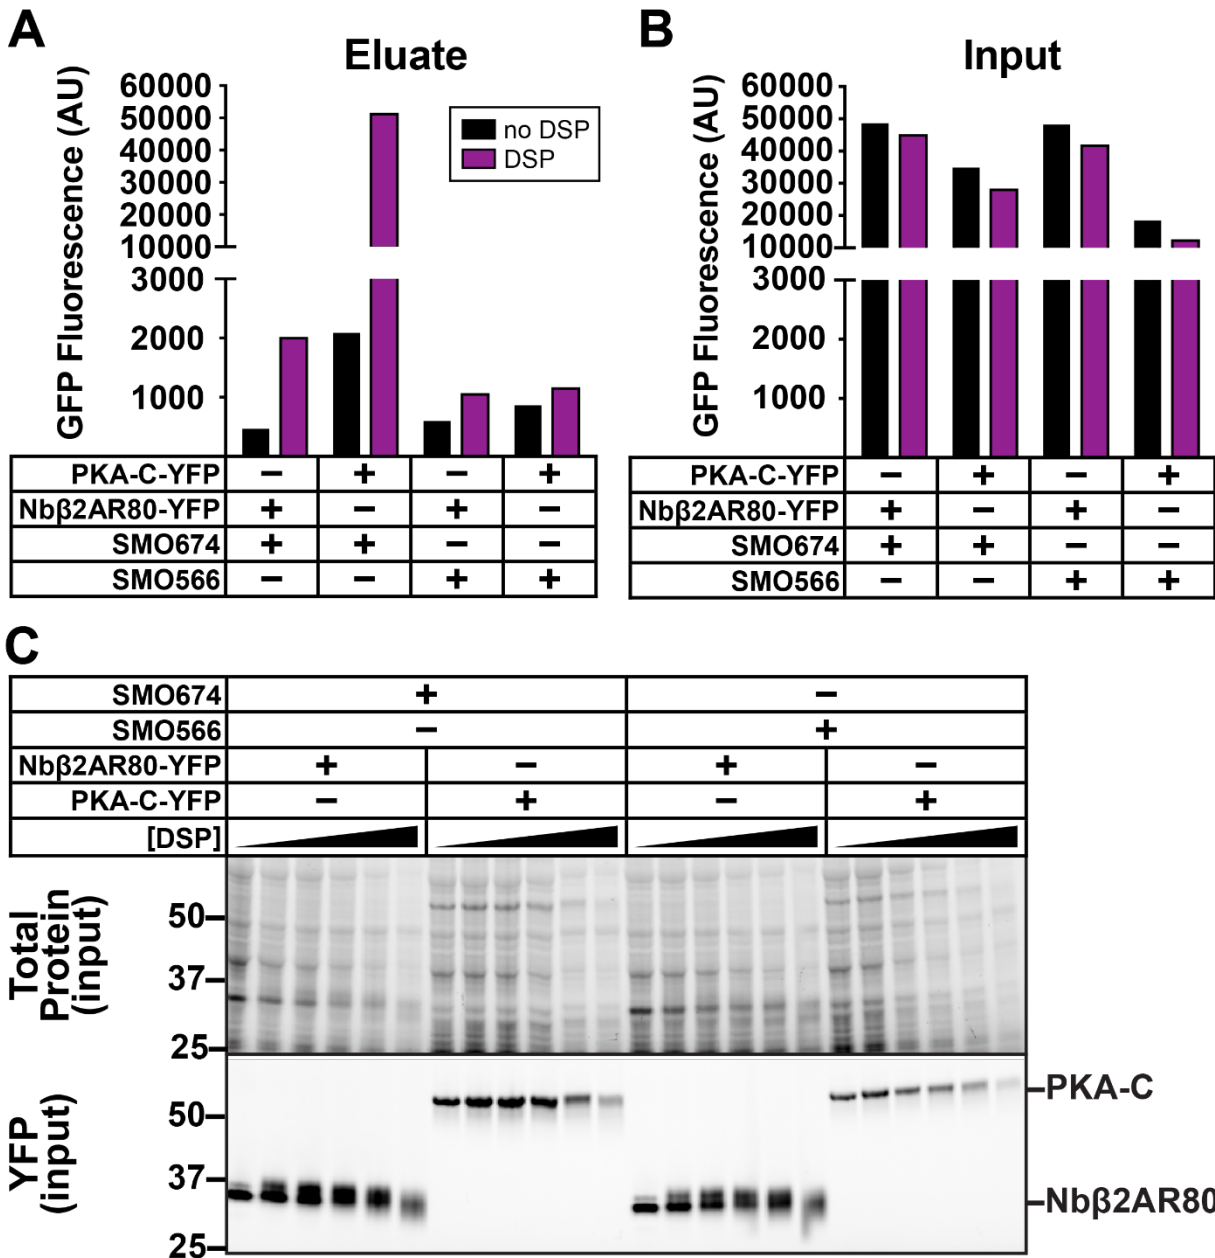

830

831 **Figure 3-figure supplement 2: Controls for SMO / PKA-C crosslinking studies.**

832 *YFP quantification of (A) FLAG elution fractions or (B) input fractions from SMO / PKA-C*  
 833 *copurification performed in the absence (black) or presence (purple) of 0.5 mM DSP crosslinker,*  
 834 *as presented in Figure 3E. (C) Protein gels of input fractions for the experiment shown in Figure*  
 835 *3E. The decrease in soluble protein yields in total cell lysates that occurs at high DSP*  
 836 *concentrations may be due to crosslinker-induced protein aggregation and loss of solubility.*  
 837 *Molecular masses are in kDa.*



838 Figure 5—figure supplement 1  
839

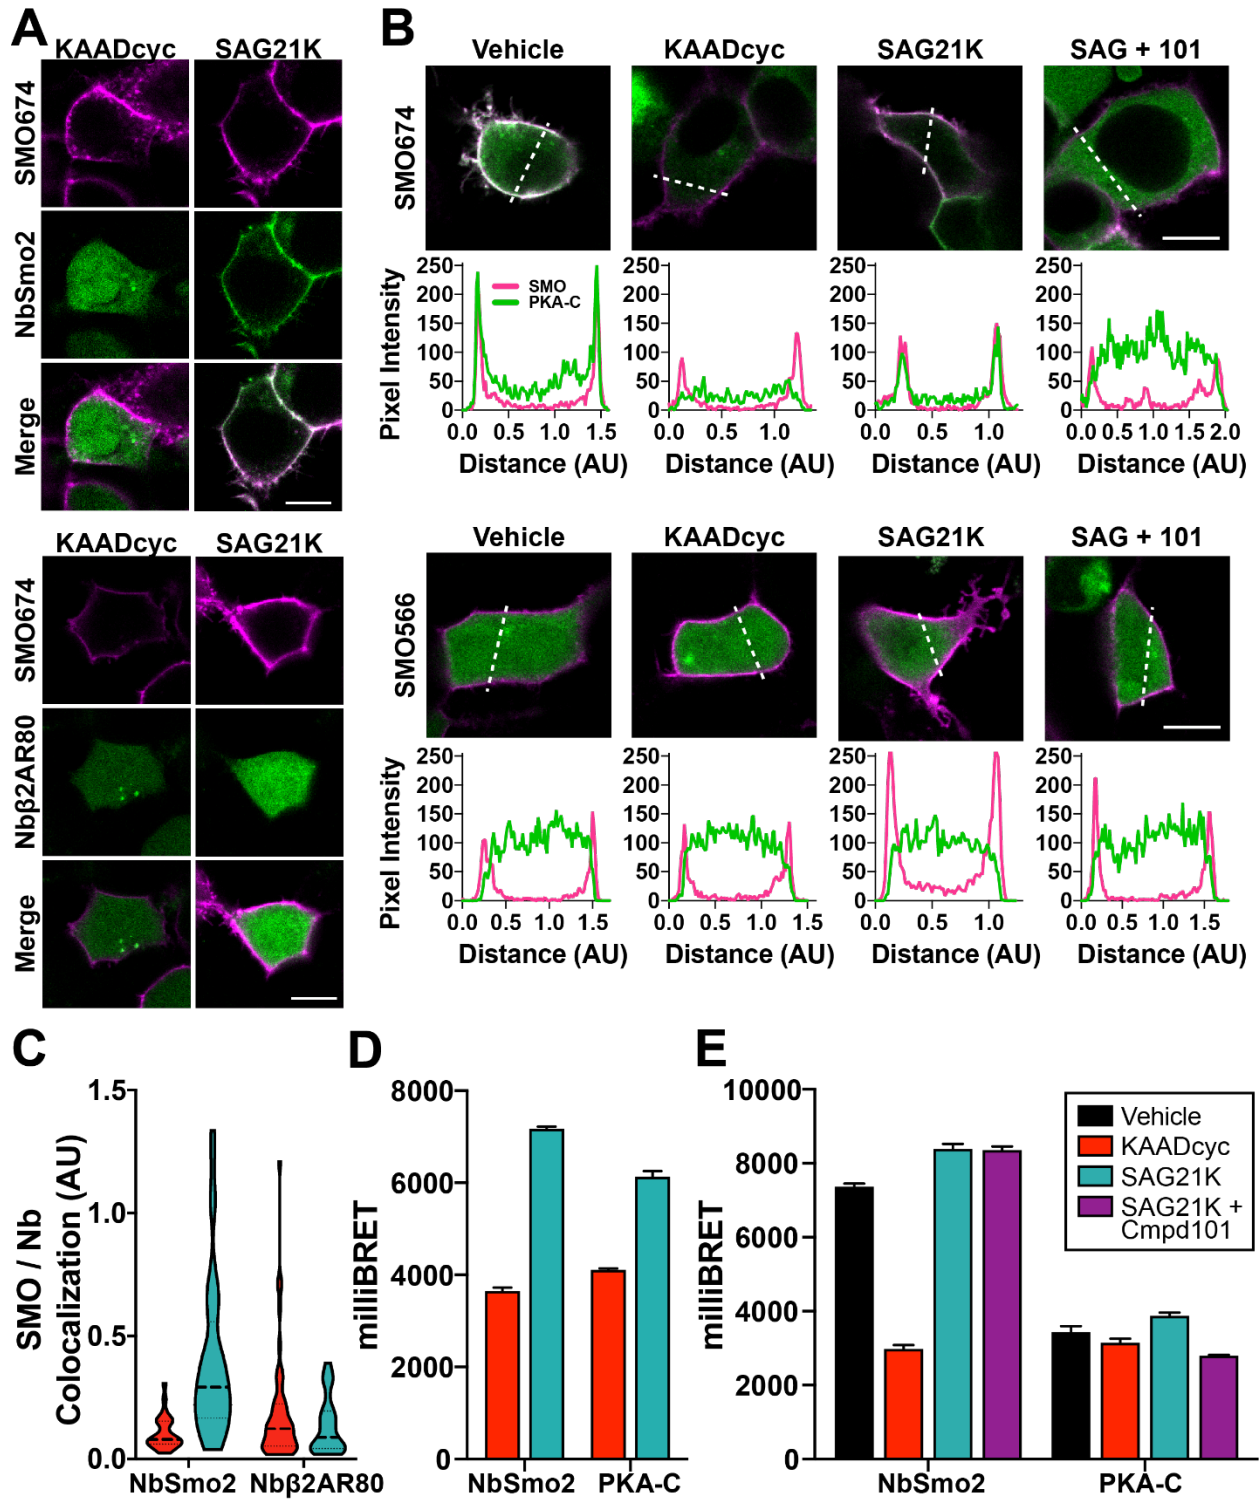

840 **Figure 5-figure supplement 1: Controls for assays to look at SMO activity- and GRK2/3-**  
841 **dependent interactions.**

842 *(A) HEK293 cells transfected with FLAG-tagged SMO674 (magenta) and YFP-tagged NbSmo2*  
843 *or GFP-tagged Nb $\beta$ 2AR80 (green) were treated with KAADcyc or SAG21k and imaged as*  
844 *described in **Figure 5B**. **(B)** Line scan analysis of images from cells expressing SMO674 (**Figure***  
845 ***5B**) or SMO566. Cells were treated as described in **Figure 5B**. **(C)** Quantification of colocalization*  
846 *between SMO and NbSmo2 or Nb $\beta$ 2AR80 for the experiment in (A) (see “Methods”). **(D)** Raw*  
847 *(non-normalized) BRET ratios from **Figure 5A**. **(E)** Raw (non-normalized) BRET ratios from*  
848 ***Figure 5D**. See Supplemental Table 1 for statistical analysis.*

849

850

851

852 **Figure 6—figure supplement 1**  
853

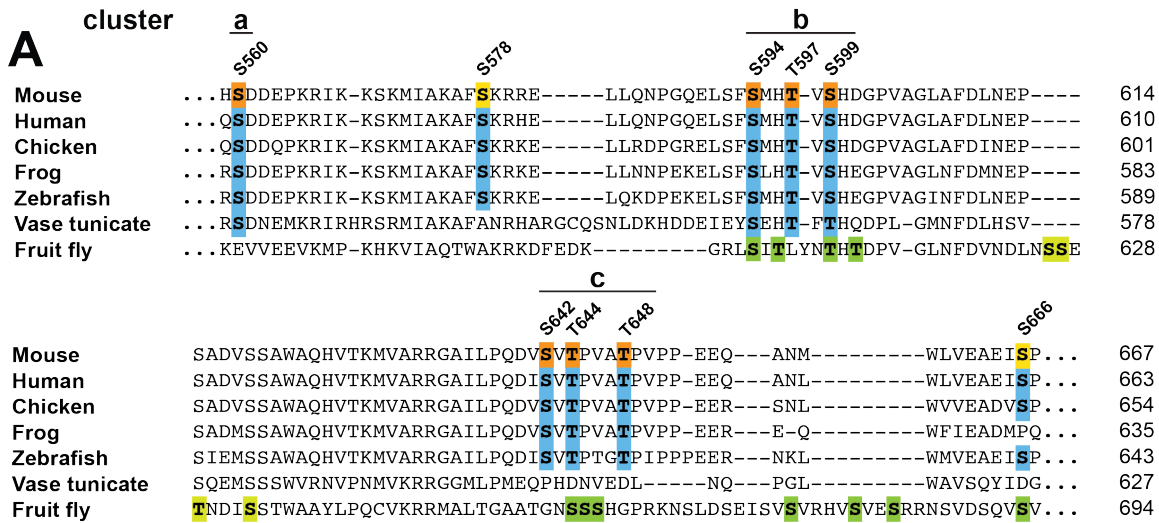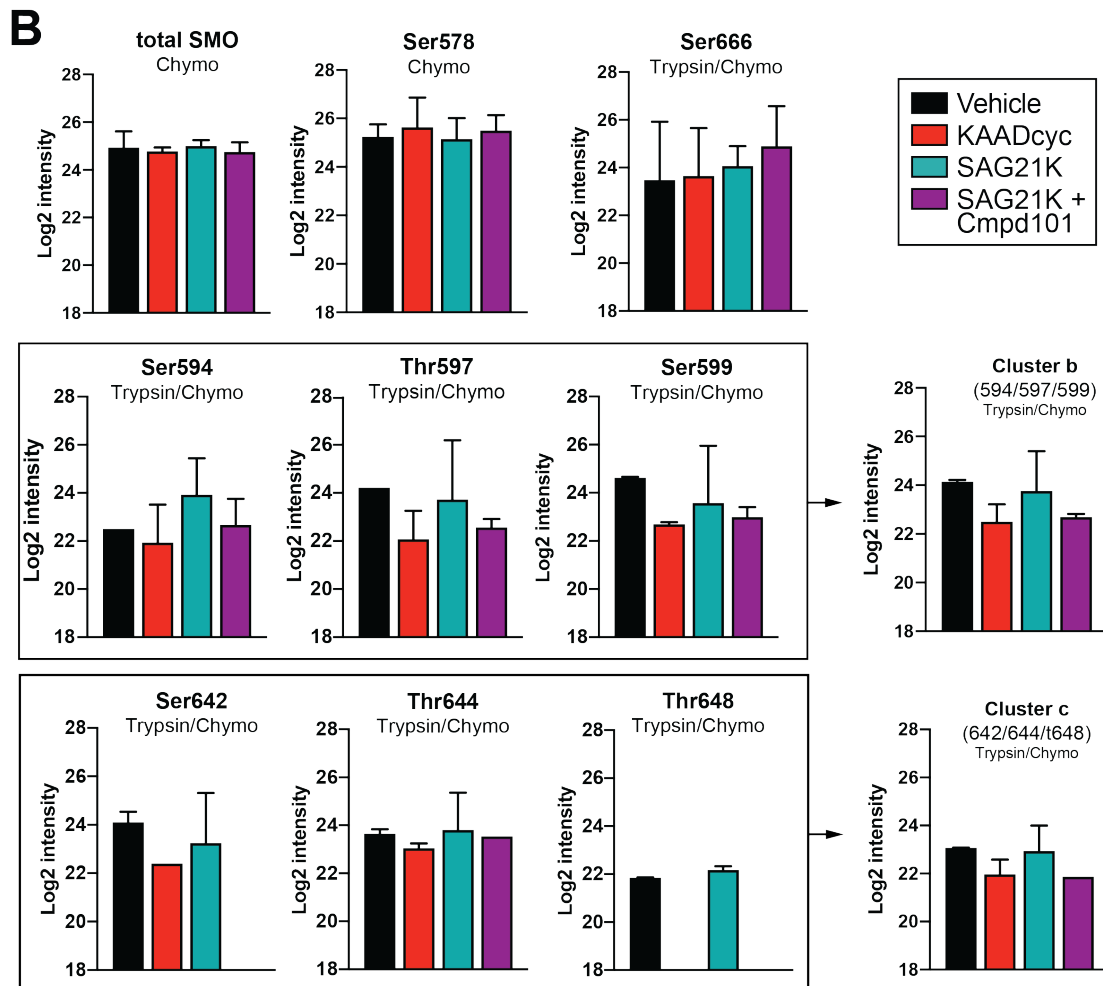

854 **Figure 6—figure supplement 1: Full sequence alignments and quantification info for mass**  
855 **spectrometry.**

856 *(A) Full alignment of SMO from Figure 6B, noting conservation of GRK2/3 among vertebrates,*  
857 *insects and basal metazoans. Interestingly, some GRK2/3 phosphosites in mouse SMO are*  
858 *charged (D or E) residues in dSmo (i.e., S560), and vice versa (i.e. D601), consistent with the*  
859 *importance of negative charges at those positions. dSmo phosphorylation sites are from (Maier*  
860 *et al., 2014), in which sites verified as GRK-dependent are indicated in dark green, while sites*  
861 *that might be GRK-dependent but were not covered during their mass spectrometry are indicated*  
862 *in light green. (B) Quantification of additional SMO and GRK2/3 activity-dependent*  
863 *phosphorylation sites and phosphorylation clusters from Figure 6B,C, as well as quantification of*  
864 *SMO following digests with the indicated proteases (“chymo” = chymotrypsin) used in our analysis*  
865 *(see Methods). Phosphorylation was not detected at S642 with SAG21k/Cmpd101 treatment, or*  
866 *at T648 with KAADcyc or SAG21k/Cmpd101 treatment, suggesting that any phosphorylation*  
867 *under these conditions lies below the limit of detection. Unambiguous phosphosite localization on*  
868 *peptides with multiple candidate phosphorylation sites in close proximity can be challenging by*  
869 *mass spectrometry (Potel et al., 2018) (see Methods). For these reasons, our quantification, and*  
870 *subsequent mutational analysis, focuses on clusters of residues rather than individual sites. n =*  
871 *3 biological and 3 technical replicates per condition.*

872

873 **Supplemental Table 1: Tests of statistical significance for all figures**

874

| Figure.   | Condition 1                                   | Condition 2                                     | Significant? | p-value (Student's t-test) |
|-----------|-----------------------------------------------|-------------------------------------------------|--------------|----------------------------|
| 1B        | PKAC: Vehicle                                 | PKAC + SMO: Vehicle                             | yes          | 0.005967                   |
| 1B        | PKA-C + SMO: Vehicle                          | PKA-C + SMO: KAADcyc                            | yes          | 0.010188                   |
| 1B        | PKA-C + M2AChR: Vehicle                       | PKA-C + M2AChR: Carbachol                       | no           | 0.353043                   |
| 1-suppl1C | SMO657: ShhN                                  | SMOdelta561-657: ShhN                           | yes          | .000007                    |
| 1-suppl1D | wild type cells: M2AChR + fsk: vehicle        | wild-type cells: M2AChR + fsk: Carbachol        | yes          | 0.002942                   |
| 1C        | PKA-C: Vehicle                                | PKA-C + SMO: Vehicle                            | yes          | 0.000443                   |
| 1C        | PKA-C + SMO: Vehicle                          | PKA-C + SMO: KAADcyc                            | yes          | 0.035508                   |
| 1-suppl1D | G $\alpha$ -null cells: M2AChR: fsk + vehicle | G $\alpha$ -null cells: M2AChR: fsk + carbachol | no           | 0.75318                    |
| 3A        | SMO + PKA-C                                   | SMO + $\beta$ arrestin1                         | yes          | <0.000001                  |
| 3B        | 657: PKA-C                                    | delta561-657: PKA-C                             | yes          | 0.00007                    |
| 3B        | 566: $\beta$ arrestin1                        | 566: PKA-C                                      | no           | 0.072522                   |
| 3C        | full-length: $\beta$ arrestin1                | full-length: PKA-C                              | yes          | <0.000001                  |
| 3C        | 657: $\beta$ arrestin1                        | 657: PKA-C                                      | yes          | 0.000005                   |
| 3C        | 614: $\beta$ arrestin1                        | 614: PKA-C                                      | yes          | 0.000002                   |
| 3C        | 574: $\beta$ arrestin1                        | 574: PKA-C                                      | yes          | 0.002667                   |
| 3C        | 566: $\beta$ arrestin1                        | 566: PKA-C                                      | no           | 0.445983                   |
| 3-suppl1B | SMO566                                        | PTCH1                                           | no           | 0.915218                   |
| 3-suppl1E | SMO657: $\beta$ arrestin1-YFP                 | SMO657: NbSmo2-YFP                              | yes          | <0.000001                  |
| 3-suppl1E | SMO657: $\beta$ arrestin1-YFP                 | SMO657: PKA-C-YFP                               | yes          | 0.000004                   |
| 3D        | SmoCT: $\beta$ arrestin1                      | SmoCT: PKA-C                                    | yes          | 0.000015                   |
| 4B        | PKA-C                                         | PKA-R                                           | yes          | 0.00012                    |
| 4C        | PKA-C-YFP: vehicle                            | PKA-C-(no tag) + PKA-R-YFP: vehicle             | yes          | 0.000085                   |
| 4C        | PKA-C-YFP + PKA-R (no tag): vehicle           | PKA-C-YFP + PKA-R (no tag): fsk                 | yes          | 0.010792                   |

|           |                               |                             |     |           |
|-----------|-------------------------------|-----------------------------|-----|-----------|
| 4E        | WT PKA-C                      | H87Q / W196R                | no  | 0.682648  |
| 4E        | WT PKA-C                      | L206R                       | yes | 0.027339  |
| 4E        | WT PKA-C                      | K73H                        | yes | 0.007473  |
| 4F        | WT PKA-C                      | delta1-24                   | yes | 0.000368  |
| 4F        | WT PKA-C                      | delta1-39                   | yes | 0.000095  |
| 5A        | NbSmo2: SAG21k                | NbSmo2: KAADcyc             | yes | 0.000002  |
| 5A        | PKA-C: SAG21k                 | PKA-C: KAADcyc              | yes | 0.000072  |
| 5C        | PKA-C: SAG21k                 | PKA-C: KAADcyc              | yes | <0.0001   |
| 5C        | PKA-C: SAG21k                 | PKA-C: SAG21k + Cmpd101     | yes | 0.0372    |
| 5C        | PKA-C: Vehicle                | PKA-C: KAADcyc              | yes | <0.0001   |
| 5-suppl1C | NbSmo2: KAADcyc               | NbSmo2: SAG21k              | yes | <0.0001   |
| 5-suppl1C | Nb $\beta$ 2AR80: KAADcyc     | Nb $\beta$ 2AR80: SAG21k    | no  | 0.1977    |
| 5-suppl1C | NbSmo2: KAADcyc               | Nb $\beta$ 2AR80: KAADcyc   | no  | 0.0747    |
| 5D        | NbSmo2: SAG21k                | NbSmo2: SAG21k + Cmpd101    | no  | 0.896283  |
| 5D        | PKA-C: SAG21k                 | PKA-C: SAG21k + Cmpd101     | yes | 0.000213  |
| 5E        | PKA-C + SMO674: Vehicle       | PKA-C + SMO674: Cmpd101     | yes | 0.012301  |
| 6C        | S560: Vehicle                 | S560: KAADcyc               | yes | <0.001    |
| 6C        | S560: SAG                     | S560: SAG21K + Cmpd101      | yes | <0.01     |
| 6D        | SMO657: PKA-C                 | SMO657Ala: PKA-C            | yes | 0.00249   |
| 7A        | SMO: ShhN                     | SMOdelta570-581; ShhN       | yes | 0.000252  |
| 7B        | SMO657: PKA-C                 | SMO657(delta570-581): PKA-C | yes | <0.000001 |
| 7D        | SMO-Nb $\beta$ 2AR80: Vehicle | SMO-Nb $\beta$ 2AR80: ShhN  | yes | 0.000216  |
| 7D        | SMO-NbSmo2: Vehicle           | SMO-NbSmo2: ShhN            | no  | 0.453546  |
| 7F        | SMO657: ShhN                  | SMO657-Ala: ShhN            | yes | 0.000198  |

875  
876  
877  
878

879 **REFERENCES:**

880

881 Alcedo, J., Ayzenzon, M., Ohlen, T., Noll, M., and Hooper, J. (1996). The *Drosophila*  
882 smoothed Gene Encodes a Seven-Pass Membrane Protein, a Putative Receptor for the  
883 Hedgehog Signal. *Cell* 86, 221–232.

884 Ayers, K.L., and Théron, P.P. (2010). Evaluating Smoothened as a G-protein-coupled receptor  
885 for Hedgehog signalling. *Trends Cell Biol* 20, 287–298.

886 Aza-Blanc, P., Ramírez-Weber, F.A., Laget, M.P., Schwartz, C., and Kornberg, T.B. (1997).  
887 Proteolysis that is inhibited by hedgehog targets Cubitus interruptus protein to the nucleus and  
888 converts it to a repressor. *Cell* 89, 1043–1053.

889 Bachmann, V.A., Mayrhofer, J.E., Ilouz, R., Tschakner, P., Raffener, P., Röck, R., Courcelles,  
890 M., Apelt, F., Lu, T.-W., Baillie, G.S., et al. (2016). Gpr161 anchoring of PKA consolidates  
891 GPCR and cAMP signaling. *Proceedings of the National Academy of Sciences* 113, 7786–7791.

892 Barzi, M., Berenguer, J., Menendez, A., Alvarez-Rodriguez, R., and Pons, S. (2009). Sonic-  
893 hedgehog-mediated proliferation requires the localization of PKA to the cilium base. *J Cell Sci*  
894 123, 62–69.

895 Bastidas, A.C., Deal, M.S., Steichen, J.M., Keshwani, M.M., Guo, Y., and Taylor, S.S. (2012).  
896 Role of N-terminal myristylation in the structure and regulation of cAMP-dependent protein  
897 kinase. *Journal of Molecular Biology* 422, 215–229.

898 Breslow, D.K., Hoogendoorn, S., Kopp, A.R., Morgens, D.W., Vu, B.K., Kennedy, M.C., Han, K.,  
899 Li, A., Hess, G.T., Bassik, M.C., et al. (2018). A CRISPR-based screen for Hedgehog signaling  
900 provides insights into ciliary function and ciliopathies. *Nature Genetics* 50, 460–471.

901 Briscoe, J., and Théron, P. (2013). The mechanisms of Hedgehog signalling and its roles in  
902 development and disease. *Nat Rev Mol Cell Bio* 14, 416–429.

903 Chen, W., Burgess, S., and Hopkins, N. (2001). Analysis of the zebrafish smoothed mutant  
904 reveals conserved and divergent functions of hedgehog activity. *Development (Cambridge,*  
905 *England)* 128, 2385–2396.

906 Chen, W., Ren, X.-R., Nelson, C.D., Barak, L.S., Chen, J.K., Beachy, P.A., Sauvage, F. de, and  
907 Lefkowitz, R.J. (2004). Activity-dependent internalization of smoothed mediated by beta-  
908 arrestin 2 and GRK2. *Science* 306, 2257–2260.

909 Chen, Y., Sasai, N., Ma, G., Yue, T., Jia, J., Briscoe, J., and Jiang, J. (2011). Sonic Hedgehog  
910 Dependent Phosphorylation by CK1 $\alpha$  and GRK2 Is Required for Ciliary Accumulation and  
911 Activation of Smoothened. *PLoS Biology* 9, e1001083.

- 912 Chiva, C., Olivella, R., Borràs, E., Espadas, G., Pastor, O., Solé, A., and Sabidó, E. (2018).  
913 QCloud: A cloud-based quality control system for mass spectrometry-based proteomics  
914 laboratories. *PLoS ONE* 13, e0189209.
- 915 Choi, M., Chang, C.-Y., Clough, T., Broudy, D., Killeen, T., MacLean, B., and Vitek, O. (2014).  
916 MSstats: an R package for statistical analysis of quantitative mass spectrometry-based  
917 proteomic experiments. *Bioinformatics (Oxford, England)* 30, 2524–2526.
- 918 Corbit, K.C., Aanstad, P., Singla, V., Norman, A.R., Stainier, D.Y.R., and Reiter, J.F. (2005).  
919 Vertebrate Smoothed functions at the primary cilium. *Nature* 437, 1018–1021.
- 920 Cox, J., and Mann, M. (2008). MaxQuant enables high peptide identification rates, individualized  
921 p.p.b.-range mass accuracies and proteome-wide protein quantification. *Nature Biotechnology*  
922 26, 1367–1372.
- 923 DebBurman, S.K., Ptasiński, J., Benovic, J.L., and Hosey, M.M. (1996). G protein-coupled  
924 receptor kinase GRK2 is a phospholipid-dependent enzyme that can be conditionally activated  
925 by G protein betagamma subunits. *The Journal of Biological Chemistry* 271, 22552–22562.
- 926 DeCamp, D.L., Thompson, T.M., Sauvage, F.J.D., and Lerner, M.R. (2000). Smoothed  
927 activates Galphai-mediated signaling in frog melanophores. *The Journal of Biological Chemistry*  
928 275, 26322–26327.
- 929 Deshpande, I., Liang, J., Hedeem, D., Roberts, K.J., Zhang, Y., Ha, B., Latorraca, N.R., Faust,  
930 B., Dror, R.O., Beachy, P.A., et al. (2019). Smoothed stimulation by membrane sterols drives  
931 Hedgehog pathway activity. *Nature* 571, 284–288.
- 932 Dorn, K.V., Hughes, C.E., and Rohatgi, R. (2012). A Smoothed-Evc2 Complex Transduces  
933 the Hedgehog Signal at Primary Cilia. *Developmental Cell* 1–13.
- 934 Eeden, F.J. van, Granato, M., Schach, U., Brand, M., Furutani-Seiki, M., Haffter, P.,  
935 Hammerschmidt, M., Heisenberg, C.P., Jiang, Y.J., Kane, D.A., et al. (1996). Mutations  
936 affecting somite formation and patterning in the zebrafish, *Danio rerio*. *Development*  
937 (Cambridge, England) 123, 153–164.
- 938 Evron, T., Daigle, T.L., and Caron, M.G. (2012). GRK2: multiple roles beyond G protein-coupled  
939 receptor desensitization. *Trends in Pharmacological Sciences* 33, 154–164.
- 940 Gaffarogullari, E.C., Masterson, L.R., Metcalfe, E.E., Traaseth, N.J., Balatri, E., Musa, M.M.,  
941 Mullen, D., Distefano, M.D., and Veglia, G. (2011). A myristoyl/phosphoserine switch controls  
942 cAMP-dependent protein kinase association to membranes. *Journal of Molecular Biology* 411,  
943 823–836.
- 944 Gigante, E., and Caspary, T. (2020). Signaling in the primary cilium through the lens of the  
945 Hedgehog pathway. *Wiley Interdiscip Rev Dev Biology* e377.



- 946 Goetz, S.C., and Anderson, K.V. (2010). The primary cilium: a signalling centre during  
947 vertebrate development. *Nature Reviews Genetics* 11, 331–344.
- 948 Goodrich, L.V., Johnson, R.L., Milenkovic, L., McMahon, J.A., and Scott, M.P. (1996).  
949 Conservation of the hedgehog/patched signaling pathway from flies to mice: induction of a  
950 mouse patched gene by Hedgehog. *Genes & Development* 10, 301–312.
- 951 Hammerschmidt, M., Bitgood, M.J., and McMahon, A.P. (1996). Protein kinase A is a common  
952 negative regulator of Hedgehog signaling in the vertebrate embryo. *Gene Dev* 10, 647–658.
- 953 Hannawacker, A., Lyga, S., Bathon, K., Zabel, U., Ronchi, C., Beuschlein, F., Reincke, M.,  
954 Lorenz, K., Allolio, B., Kisker, C., et al. (2019). PKA catalytic subunit mutations in adrenocortical  
955 Cushing’s adenoma impair association with the regulatory subunit. *Nature*  
956 *Communications* 5, 1–7.
- 957 Haycraft, C., Banizs, B., Aydin-Son, Y., Zhang, Q., Michaud, E., and Yoder, B. (2005). Gli2 and  
958 Gli3 localize to cilia and require the intraflagellar transport protein polaris for processing and  
959 function. *Plos Genet* 1, e53.
- 960 Heuvel, M., and Ingham, P. (1996). *smoothed* encodes a receptor-like serpentine protein  
961 required for hedgehog signalling. *Nature* 382, 547–551.
- 962 Hisano, Y., Kono, M., Cartier, A., Engelbrecht, E., Kano, K., Kawakami, K., Xiong, Y., Piao, W.,  
963 Galvani, S., Yanagida, K., et al. (2019). Lysolipid receptor cross-talk regulates lymphatic  
964 endothelial junctions in lymph nodes. *The Journal of Experimental Medicine* 216, 1582–1598.
- 965 Homan, K.T., and Tesmer, J.J.G. (2014). Structural insights into G protein-coupled receptor  
966 kinase function. *Current Opinion in Cell Biology* 27, 25–31.
- 967 Huang, P., and Schier, A.F. (2009). Dampened Hedgehog signaling but normal Wnt signaling in  
968 zebrafish without cilia. *Development (Cambridge, England)* 136, 3089–3098.
- 969 Huang, W., Manglik, A., Venkatakrishnan, A., Laeremans, T., Feinberg, E., Sanborn, A., Kato,  
970 H., Livingston, K., Thorsen, T., Kling, R., et al. (2015). Structural insights into  $\mu$ -opioid receptor  
971 activation. *Nature* 524, 315–321.
- 972 Huang, W., Masureel, M., Qianhui, Q., Janetzko, J., Inoue, A., Kato, H.E., Robertson, M.J.,  
973 Nguyen, K.C., Glenn, J.S., Skiniotis, G., et al. (2020). Structure of the neurotensin receptor 1 in  
974 complex with  $\beta$ -arrestin 1. *Nature* 1–28.
- 975 Huang, Y., Roelink, H., and McKnight, G. (2002). Protein Kinase A Deficiency Causes Axially  
976 Localized Neural Tube Defects in Mice. *J Biol Chem* 277, 19889–19896.
- 977 Huangfu, D., and Anderson, K.V. (2006). Signaling from Smo to Ci/Gli: conservation and  
978 divergence of Hedgehog pathways from *Drosophila* to vertebrates. *Development (Cambridge,*  
979 *England)* 133, 3–14.

- 980 Hui, C., and Angers, S. (2011). Gli proteins in development and disease. *Annu Rev Cell Dev Bi*  
981 *27*, 513–537.
- 982 Humke, E.W., Dorn, K.V., Milenkovic, L., Scott, M.P., and Rohatgi, R. (2010). The output of  
983 Hedgehog signaling is controlled by the dynamic association between Suppressor of Fused and  
984 the Gli proteins. *Genes & Development* *24*, 670–682.
- 985 Hwang, S., White, K., Somatilaka, B., Shelton, J., Richardson, J., and Mukhopadhyay, S.  
986 (2018). The G protein-coupled receptor Gpr161 regulates forelimb formation, limb patterning  
987 and skeletal morphogenesis in a primary cilium-dependent manner. *Development* *145*,  
988 dev154054.
- 989 Inagaki, S., Ghirlando, R., White, J.F., Gvozdenovic-Jeremic, J., Northup, J.K., and  
990 Grisshammer, R. (2012). Modulation of the interaction between neurotensin receptor NTS1 and  
991 Gq protein by lipid. *Journal of Molecular Biology* *417*, 95–111.
- 992 Inagaki, S., Ghirlando, R., Vishnivetskiy, S.A., Homan, K.T., White, J.F., Tesmer, J.J.G.,  
993 Gurevich, V.V., and Grisshammer, R. (2015). G Protein-Coupled Receptor Kinase 2 (GRK2)  
994 and 5 (GRK5) Exhibit Selective Phosphorylation of the Neurotensin Receptor in Vitro.  
995 *Biochemistry* *54*, 4320–4329.
- 996 Ingham, P.W., and McMahon, A.P. (2001). Hedgehog signaling in animal development:  
997 paradigms and principles. *Gene Dev* *15*, 3059–3087.
- 998 Ingham, P.W., Nakano, Y., and Seger, C. (2011). Mechanisms and functions of Hedgehog  
999 signalling across the metazoa. *Nat Rev Genetics* *12*.
- 1000 Irannejad, R., Tomshine, J.C., Tomshine, J.R., Chevalier, M., Mahoney, J.P., Steyaert, J.,  
1001 Rasmussen, S.G.F., Sunahara, R.K., El-Samad, H., Huang, B., et al. (2013). Conformational  
1002 biosensors reveal GPCR signalling from endosomes. *Nature* *495*, 534–538.
- 1003 Jiang, J., and Struhl, G. (1995). Protein kinase A and hedgehog signaling in drosophila limb  
1004 development. *Cell* *80*, 563–572.
- 1005 Jiang, J.Y., Falcone, J.L., Curci, S., and Hofer, A.M. (2019). Direct visualization of cAMP  
1006 signaling in primary cilia reveals up-regulation of ciliary GPCR activity following Hedgehog  
1007 activation. *Proceedings of the National Academy of Sciences* *116*, 12066–12071.
- 1008 Karlstrom, R., Talbot, W., and Schier, A. (1999). Comparative synteny cloning of zebrafish you-  
1009 too: mutations in the Hedgehog target gli2 affect ventral forebrain patterning. *Gene Dev* *13*,  
1010 388–393.
- 1011 Kenakin, T. (2008). Receptor theory. *Curr Protoc Pharmacol* Editor Board S J Enna Ed Et Al  
1012 *Chapter 1*, Unit1.2.

- 1013 Kim, H., Richardson, J., Eeden, F., and Ingham, P. (2010). Gli2a protein localization reveals a  
1014 role for Iguana/DZIP1 in primary ciliogenesis and a dependence of Hedgehog signal  
1015 transduction on primary cilia in the zebrafish. *Bmc Biol* 8, 65.
- 1016 Kim, J., Kato, M., and Beachy, P. (2009). Gli2 trafficking links Hedgehog-dependent activation  
1017 of Smoothed in the primary cilium to transcriptional activation in the nucleus. *Proc National*  
1018 *Acad Sci* 106, 21666–21671.
- 1019 Kim, J., Hsia, E.Y.C., Brigui, A., Plessis, A., Beachy, P.A., and Zheng, X. (2015). The role of  
1020 ciliary trafficking in Hedgehog receptor signaling. *Science Signaling* 8, ra55.
- 1021 Kimmel, C.B., Ballard, W.W., Kimmel, S.R., Ullmann, B., and Schilling, T.F. (1995). Stages of  
1022 embryonic development of the zebrafish. *Developmental Dynamics : An Official Publication of*  
1023 *the American Association of Anatomists* 203, 253–310.
- 1024 Knighton, D., Zheng, J., Eyck, L., Xuong, N., Taylor, S., and Sowadski, J. (1991). Structure of a  
1025 peptide inhibitor bound to the catalytic subunit of cyclic adenosine monophosphate-dependent  
1026 protein kinase. *Science* 253, 414–420.
- 1027 Komolov, K.E., and Benovic, J.L. (2018). G protein-coupled receptor kinases: Past, present and  
1028 future. *Cellular Signalling* 41, 17–24.
- 1029 Komolov, K.E., Du, Y., Duc, N.M., Betz, R.M., Rodrigues, J.P.G.L.M., Leib, R.D., Patra, D.,  
1030 Skiniotis, G., Adams, C.M., Dror, R.O., et al. (2017). Structural and Functional Analysis of a  $\beta$ 2-  
1031 Adrenergic Receptor Complex with GRK5. *Cell* 169, 407-421.e16.
- 1032 Kong, J., Siebold, C., and Rohatgi, R. (2019). Biochemical mechanisms of vertebrate hedgehog  
1033 signaling. *Development* 146, dev166892.
- 1034 Kovacs, J., Whalen, E., Liu, R., Xiao, K., Kim, J., Chen, M., Wang, J., Chen, W., and Lefkowitz,  
1035 R. (2008).  $\beta$ -Arrestin–Mediated Localization of Smoothed to the Primary Cilium. *Science* 320,  
1036 1777–1781.
- 1037 Kozielowicz, P., Turku, A., and Schulte, G. (2020). Molecular Pharmacology of Class F  
1038 Receptor Activation. *Mol Pharmacol* 97, 62–71.
- 1039 Lefkowitz, R.J. (2000). The superfamily of heptahelical receptors. *Nature Cell Biology* 2, E133-6.
- 1040 Lefkowitz, R.J. (2002). Signalling: Seven-transmembrane receptors. *Nature Reviews Molecular*  
1041 *Cell Biology* 3, 639–650.
- 1042 Li, S., Ma, G., Wang, B., and Jiang, J. (2014). Hedgehog induces formation of PKA-  
1043 Smoothed complexes to promote Smoothed phosphorylation and pathway activation. *Sci*  
1044 *Signal* 7, ra62–ra62.
- 1045 Li, W., Ohlmeyer, J., Lane, M., and Kalderon, D. (1995). Function of protein kinase A in  
1046 hedgehog signal transduction and *Drosophila* imaginal disc development. *Cell* 80, 553–562.

- 1047 Lipinski, R., Bijlsma, M., Gipp, J., Podhaizer, D., and Bushman, W. (2008). Establishment and  
1048 characterization of immortalized Gli-null mouse embryonic fibroblast cell lines. *Bmc Cell Biol* 9,  
1049 49.
- 1050 Low, W.-C., Wang, C., Pan, Y., Huang, X.-Y., Chen, J.K., and Wang, B. (2008). The decoupling  
1051 of Smoothed from G $\alpha$  i proteins has little effect on Gli3 protein processing and Hedgehog-  
1052 regulated chick neural tube patterning. *Developmental Biology* 321, 188–196.
- 1053 Maier, D., Cheng, S., Faubert, D., and Hipfner, D.R. (2014). A Broadly Conserved G-Protein-  
1054 Coupled Receptor Kinase Phosphorylation Mechanism Controls *Drosophila* Smoothed  
1055 Activity. *PLoS Genetics* 10, e1004399.
- 1056 Maity, T., Fuse, N., and Beachy, P. (2005). Molecular mechanisms of Sonic hedgehog mutant  
1057 effects in holoprosencephaly. *P Natl Acad Sci Usa* 102, 17026–17031.
- 1058 Marullo, S., and Bouvier, M. (2007). Resonance energy transfer approaches in molecular  
1059 pharmacology and beyond. *Trends in Pharmacological Sciences* 28, 362–365.
- 1060 Masdeu, C., Faure, H., Coulombe, J., Schoenfelder, A., Mann, A., Brabet, I., Pin, J.-P., Traiffort,  
1061 E., and Ruat, M. (2006). Identification and characterization of Hedgehog modulator properties  
1062 after functional coupling of Smoothed to G15. *Biochemical and Biophysical Research*  
1063 *Communications* 349, 471–479.
- 1064 McMahon, C., Baier, A.S., Pascolutti, R., Wegrecki, M., Zheng, S., Ong, J.X., Erlandson, S.C.,  
1065 Hilger, D., Rasmussen, S.G.F., Ring, A.M., et al. (2018). Yeast surface display platform for rapid  
1066 discovery of conformationally selective nanobodies. *Nature Structural &#38; Molecular Biology*  
1067 25, 289–296.
- 1068 Meloni, A.R., Fralish, G.B., Kelly, P., Salahpour, A., Chen, J.K., Wechsler-Reya, R.J., Lefkowitz,  
1069 R.J., and Caron, M.G. (2006). Smoothed signal transduction is promoted by G protein-  
1070 coupled receptor kinase 2. *Molecular and Cellular Biology* 26, 7550–7560.
- 1071 Méthot, N., and Basler, K. (1999). Hedgehog controls limb development by regulating the  
1072 activities of distinct transcriptional activator and repressor forms of *Cubitus interruptus*. *Cell* 96,  
1073 819–831.
- 1074 Mick, D.U., Rodrigues, R.B., Leib, R.D., Adams, C.M., Chien, A.S., Gygi, S.P., and Nachury,  
1075 M.V. (2015). Proteomics of Primary Cilia by Proximity Labeling. *Developmental Cell*.
- 1076 Moore, B.S., Stepanchick, A.N., Tewson, P.H., Hartle, C.M., Zhang, J., Quinn, A.M., Hughes,  
1077 T.E., and Mirshahi, T. (2016). Cilia have high cAMP levels that are inhibited by Sonic  
1078 Hedgehog-regulated calcium dynamics. *Proceedings of the National Academy of Sciences* 113,  
1079 13069–13074.
- 1080 Muenke, M., and Beachy, P. (2000). Genetics of ventral forebrain development and  
1081 holoprosencephaly. *Curr Opin Genet Dev* 10, 262–269.

- 1082 Mukhopadhyay, S., Wen, X., Ratti, N., Loktev, A., Rangell, L., Scales, S.J., and Jackson, P.K.  
1083 (2013). The ciliary G-protein-coupled receptor Gpr161 negatively regulates the Sonic hedgehog  
1084 pathway via cAMP signaling. *Cell* 152, 210–223.
- 1085 Myers, B.R., Sever, N., Chong, Y.C., Kim, J., Belani, J.D., Rychnovsky, S., Bazan, J.F., and  
1086 Beachy, P.A. (2013). Hedgehog Pathway Modulation by Multiple Lipid Binding Sites on the  
1087 Smoothed Effector of Signal Response. *Developmental Cell*.
- 1088 Myers, B.R., Neahring, L., Zhang, Y., Roberts, K.J., and Beachy, P.A. (2017). Rapid, direct  
1089 activity assays for Smoothed reveal Hedgehog pathway regulation by membrane cholesterol  
1090 and extracellular sodium. *Proc National Acad Sci* 114, E11141–E11150.
- 1091 Niewiadomski, P., Kong, J.H., Ahrends, R., Ma, Y., Humke, E.W., Khan, S., Teruel, M.N.,  
1092 Novitch, B.G., and Rohatgi, R. (2013). Gli Protein Activity Is Controlled by Multisite  
1093 Phosphorylation in Vertebrate Hedgehog Signaling. *CellReports*.
- 1094 Ocbina, P.J.R., and Anderson, K.V. (2008). Intraflagellar transport, cilia, and mammalian  
1095 Hedgehog signaling: analysis in mouse embryonic fibroblasts. *Developmental Dynamics : An*  
1096 *Official Publication of the American Association of Anatomists* 237, 2030–2038.
- 1097 Orellana, S.A., and McKnight, G.S. (1992). Mutations in the catalytic subunit of cAMP-  
1098 dependent protein kinase result in unregulated biological activity. *Proceedings of the National*  
1099 *Academy of Sciences of the United States of America* 89, 4726–4730.
- 1100 Pak, E., and Segal, R. (2016). Hedgehog Signal Transduction: Key Players, Oncogenic Drivers,  
1101 and Cancer Therapy. *Dev Cell* 38, 333–344.
- 1102 Pepperkok, R., Hotz-Wagenblatt, A., König, N., Girod, A., Bossemeyer, D., and Kinzel, V.  
1103 (2000). Intracellular distribution of mammalian protein kinase A catalytic subunit altered by  
1104 conserved Asn2 deamidation. *The Journal of Cell Biology* 148, 715–726.
- 1105 Perez-Riverol, Y., Csordas, A., Bai, J., Bernal-Llinares, M., Hewapathirana, S., Kundu, D.,  
1106 Inuganti, A., Griss, J., Mayer, G., Eisenacher, M., et al. (2018). The PRIDE database and  
1107 related tools and resources in 2019: improving support for quantification data. *Nucleic Acids*  
1108 *Res* 47, gky1106-.
- 1109 Petrova, R., and Joyner, A. (2014). Roles for Hedgehog signaling in adult organ homeostasis  
1110 and repair. *Dev Camb Engl* 141, 3445–3457.
- 1111 Philipp, M., Fralish, G.B., Meloni, A.R., Chen, W., MacInnes, A.W., Barak, L.S., and Caron,  
1112 M.G. (2008). Smoothed signaling in vertebrates is facilitated by a G protein-coupled receptor  
1113 kinase. *Molecular Biology of the Cell* 19, 5478–5489.
- 1114 Potel, C., Lemeer, S., and Heck, A. (2018). Phosphopeptide fragmentation and site localization  
1115 by mass spectrometry; an update. *Anal Chem* 91, 126–141.

- 1116 Pusapati, G.V., Kong, J.H., Patel, B.B., Krishnan, A., Sagner, A., Kinnebrew, M., Briscoe, J.,  
1117 Aravind, L., and Rohatgi, R. (2017). CRISPR Screens Uncover Genes that Regulate Target Cell  
1118 Sensitivity to the Morphogen Sonic Hedgehog. *Developmental Cell* *44*, 113-129.e8.
- 1119 Pusapati, G.V., Kong, J.H., Patel, B.B., Gouti, M., Sagner, A., Sircar, R., Luchetti, G., Ingham,  
1120 P.W., Briscoe, J., and Rohatgi, R. (2018). G protein-coupled receptors control the sensitivity of  
1121 cells to the morphogen Sonic Hedgehog. *Science Signaling* *11*.
- 1122 Qi, X., and Li, X. (2020). Mechanistic Insights into the Generation and Transduction of  
1123 Hedgehog Signaling. *Trends Biochem Sci* *45*, 397–410.
- 1124 Ranieri, N., Thérond, P.P., and Ruel, L. (2014). Switch of PKA substrates from Cubitus  
1125 interruptus to Smoothened in the Hedgehog signalosome complex. *Nat Commun* *5*, 5034.
- 1126 Rasmussen, S.G.F., Choi, H.-J., Fung, J.J., Pardon, E., Casarosa, P., Chae, P.S., Devree, B.T.,  
1127 Rosenbaum, D.M., Thian, F.S., Kobilka, T.S., et al. (2011). Structure of a nanobody-stabilized  
1128 active state of the  $\beta(2)$  adrenoceptor. *Nature* *469*, 175–180.
- 1129 Regard, J.B., Malhotra, D., Gvozdenovic-Jeremic, J., Josey, M., Chen, M., Weinstein, L.S., Lu,  
1130 J., Shore, E.M., Kaplan, F.S., and Yang, Y. (2013). Activation of Hedgehog signaling by loss of  
1131 GNAS causes heterotopic ossification. *Nat Med* *19*, 1505–1512.
- 1132 Riobo, N.A., Saucy, B., Dilizio, C., and Manning, D.R. (2006). Activation of heterotrimeric G  
1133 proteins by Smoothened. *Proc National Acad Sci* *103*, 12607–12612.
- 1134 Roberts, K., Kershner, A., and Beachy, P. (2017). The Stromal Niche for Epithelial Stem Cells:  
1135 A Template for Regeneration and a Brake on Malignancy. *Cancer Cell* *32*, 404–410.
- 1136 Rohatgi, R., Milenkovic, L., and Scott, M.P. (2007). Patched1 regulates hedgehog signaling at  
1137 the primary cilium. *Science* *317*, 372–376.
- 1138 Rohatgi, R., Milenkovic, L., Corcoran, R.B., and Scott, M.P. (2009). Hedgehog signal  
1139 transduction by Smoothened: pharmacologic evidence for a 2-step activation process.  
1140 *Proceedings of the National Academy of Sciences of the United States of America* *106*, 3196–  
1141 3201.
- 1142 Sastri, M., Barraclough, D.M., Carmichael, P.T., and Taylor, S.S. (2005). A-kinase-interacting  
1143 protein localizes protein kinase A in the nucleus. *Proceedings of the National Academy of  
1144 Sciences of the United States of America* *102*, 349–354.
- 1145 Scott, J., and Pawson, T. (2009). Cell Signaling in Space and Time: Where Proteins Come  
1146 Together and When They're Apart. *Science* *326*, 1220–1224.
- 1147 Sharpe, H.J., and Sauvage, F.J. de (2018). Grking the Smoothened signal. *Science Signaling*  
1148 *11*, eaar6377.

- 1149 Shaywitz, A.J., and Greenberg, M.E. (1999). CREB: a stimulus-induced transcription factor  
1150 activated by a diverse array of extracellular signals. *Annual Review of Biochemistry* 68, 821–  
1151 861.
- 1152 Shen, F., Cheng, L., Douglas, A.E., Riobo, N.A., and Manning, D.R. (2013). Smoothed is a  
1153 fully competent activator of the heterotrimeric G protein G(i). *Molecular Pharmacology* 83, 691–  
1154 697.
- 1155 Shenoy, S.K., and Lefkowitz, R.J. (2011).  $\beta$ -Arrestin-mediated receptor trafficking and signal  
1156 transduction. *Trends in Pharmacological Sciences* 32, 521–533.
- 1157 Shimada, I., Hwang, S., Somatilaka, B., Wang, X., Skowron, P., Kim, J., Kim, M., Shelton, J.,  
1158 Rajaram, V., Xuan, Z., et al. (2018). Basal Suppression of the Sonic Hedgehog Pathway by the  
1159 G-Protein-Coupled Receptor Gpr161 Restricts Medulloblastoma Pathogenesis. *Cell Reports* 22,  
1160 1169–1184.
- 1161 Sievers, F., Wilm, A., Dineen, D., Gibson, T.J., Karplus, K., Li, W., Lopez, R., McWilliam, H.,  
1162 Remmert, M., Söding, J., et al. (2011). Fast, scalable generation of high-quality protein multiple  
1163 sequence alignments using Clustal Omega. *Molecular Systems Biology* 7, 539.
- 1164 Staus, D.P., Hu, H., Robertson, M.J., Kleinhenz, A.L.W., Wingler, L.M., Capel, W.D., Latorraca,  
1165 N.R., Lefkowitz, R.J., and Skiniotis, G. (2020). Structure of the M2 muscarinic receptor– $\beta$ -  
1166 arrestin complex in a lipid nanodisc. *Nature* 1–28.
- 1167 Stickney, H.L., Barresi, M.J.F., and Devoto, S.H. (2000). Somite development in zebrafish.  
1168 *Developmental Dynamics* 219, 287–303.
- 1169 Taipale, J., Chen, J.K., Cooper, M.K., Wang, B., Mann, R.K., Milenkovic, L., Scott, M.P., and  
1170 Beachy, P.A. (2000). Effects of oncogenic mutations in Smoothed and Patched can be  
1171 reversed by cyclopamine. *Nature* 406, 1005–1009.
- 1172 Taylor, S.S., Ilouz, R., Zhang, P., and Kornev, A.P. (2012). Assembly of allosteric  
1173 macromolecular switches: lessons from PKA. *Nature Reviews Molecular Cell Biology* 13, 646–  
1174 658.
- 1175 Taylor, S.S., Zhang, P., Steichen, J.M., Keshwani, M.M., and Kornev, A.P. (2013). PKA: lessons  
1176 learned after twenty years. *Biochimica et Biophysica Acta* 1834, 1271–1278.
- 1177 Tholey, A., Pipkorn, R., Bossemeyer, D., Kinzel, V., and Reed, J. (2001). Influence of  
1178 myristoylation, phosphorylation, and deamidation on the structural behavior of the N-terminus of  
1179 the catalytic subunit of cAMP-dependent protein kinase. *Biochemistry* 40, 225–231.
- 1180 Tillo, S.E., Xiong, W.-H., Takahashi, M., Miao, S., Andrade, A.L., Fortin, D.A., Yang, G., Qin, M.,  
1181 Smoody, B.F., Stork, P.J.S., et al. (2017). Liberated PKA Catalytic Subunits Associate with the  
1182 Membrane via Myristoylation to Preferentially Phosphorylate Membrane Substrates. *CellReports*  
1183 19, 617–629.

- 1184 Torres-Quesada, O., Mayrhofer, J., and Stefan, E. (2017). The many faces of  
1185 compartmentalized PKA signalosomes. *Cell Signal* 37, 1–11.
- 1186 Tschaikner, P., Enzler, F., Torres-Quesada, O., Aanstad, P., and Stefan, E. (2020). Hedgehog  
1187 and Gpr161: Regulating cAMP Signaling in the Primary Cilium. *Cells* 9, 118–14.
- 1188 Tuson, M., He, M., and Anderson, K.V. (2011). Protein kinase A acts at the basal body of the  
1189 primary cilium to prevent Gli2 activation and ventralization of the mouse neural tube. *Dev Camb*  
1190 *Engl* 138, 4921–4930.
- 1191 Varjosalo, M., Li, S.-P., and Taipale, J. (2006). Divergence of hedgehog signal transduction  
1192 mechanism between *Drosophila* and mammals. *Developmental Cell* 10, 177–186.
- 1193 Wang, B., Fallon, J.F., and Beachy, P.A. (2000). Hedgehog-regulated processing of Gli3  
1194 produces an anterior/posterior repressor gradient in the developing vertebrate limb. *Cell* 100,  
1195 423–434.
- 1196 Westerfield, M. (2007). *The Zebrafish Book*.
- 1197 Wilson, C.W., Chen, M.-H., and Chuang, P.-T. (2009). Smoothed adopts multiple active and  
1198 inactive conformations capable of trafficking to the primary cilium. *PLoS ONE* 4, e5182.
- 1199 Wolff, C., Roy, S., and Ingham, P.W. (2003). Multiple muscle cell identities induced by distinct  
1200 levels and timing of hedgehog activity in the zebrafish embryo. *Current Biology : CB* 13, 1169–  
1201 1181.
- 1202 Wu, F., Zhang, Y., Sun, B., McMahon, A.P., and Wang, Y. (2017). Hedgehog Signaling: From  
1203 Basic Biology to Cancer Therapy. *Cell Chem Biol* 24.
- 1204 Zhang, H., Takeda, H., Tsuji, T., Kamiya, N., Rajderkar, S., Louie, K., Collier, C., Scott, G., Ray,  
1205 M., Mochida, Y., et al. (2015a). Generation of *Evc2*/Limbin global and conditional KO mice and  
1206 its roles during mineralized tissue formation. *Genesis (New York, N.Y. : 2000)* 53, 612–626.
- 1207 Zhang, M., Liu, X., Zhang, Y., and Zhao, J. (2010). Loss of betaarrestin1 and betaarrestin2  
1208 contributes to pulmonary hypoplasia and neonatal lethality in mice. *Developmental Biology* 339,  
1209 407–417.
- 1210 Zhang, P., Ye, F., Bastidas, A.C., Kornev, A.P., Wu, J., Ginsberg, M.H., and Taylor, S.S.  
1211 (2015b). An Isoform-Specific Myristylation Switch Targets Type II PKA Holoenzymes to  
1212 Membranes. *Structure (London, England : 1993)* 23, 1563–1572.
- 1213 Zhang, X., Ramalho-Santos, M., and McMahon, A. (2001). Smoothed Mutants Reveal  
1214 Redundant Roles for Shh and Ihh Signaling Including Regulation of L/R Asymmetry by the  
1215 Mouse Node. *Cell* 105, 781–792.
- 1216 Zhao, L., Wang, L., Chi, C., Lan, W., and Su, Y. (2017). The emerging roles of phosphatases in  
1217 Hedgehog pathway. *Cell Communication and Signaling : CCS* 15, 35–13.



1218 Zhao, Z., Lee, R.T.H., Pusapati, G.V., Iyu, A., Rohatgi, R., and Ingham, P.W. (2016). An  
1219 essential role for Grk2 in Hedgehog signalling downstream of Smoothened. EMBO Reports.

1220

1221
